# Supplementary material for: The influence of ecological infrastructures adjacent to crops on their carabid assemblages in intensive agroecosystems
Source: PeerJ. 2020 Jan 10;8:e8094. doi: 10.7717/peerj.8094 (PMC6956773; doi:10.7717/peerj.8094)
Supplement: Dataset S1 — Excel file comprising : (1) Field data per trap (including lost traps); (2) Standardized data by transect (sum of traps and catching session by transect); (3) Files for the ANOSIM; 4) Data imported in R for the GLM calculation and (4) A list of functional traits by carabid species. [file peerj-08-8094-s005.xls]

## Sheet: Raw_data
Site	Type	EI	Trap	Date	Activity_density	Agomue	Amaaen	Amaaul	Amacom	Amaeur	Amalun	Amaple	Amasim	Ancdor	Anibin	Asafla	Badbip	Bemlam	Bempro	Bemqua	Bemtet	Calfus	Calmel	Ciccam	Clifos	Haraff	Harlat	Hartar	Leifer	Leiful	Lorpil	Nebbre	Nebsal	Notbig	Notqua	Notsub	Poecup	Poever	Pseruf	Ptemad	Ptemel	Ptenig	Ptestr	Ptever	Stopum	Trequa
B	A	CRL2	1	R1	20	0	0	0	0	0	0	0	0	6	0	0	1	0	0	0	6	0	0	0	0	0	0	0	0	0	0	5	2	0	0	0	0	0	0	0	0	0	0	0	0	0
B	A	CRL2	1	R2	22	0	0	0	0	0	0	0	0	5	0	0	0	2	4	0	9	0	0	0	0	0	0	0	0	0	0	0	0	0	0	0	0	0	0	0	1	0	0	0	0	1
B	A	CRL2	1	R3	-999	-999	-999	-999	-999	-999	-999	-999	-999	-999	-999	-999	-999	-999	-999	-999	-999	-999	-999	-999	-999	-999	-999	-999	-999	-999	-999	-999	-999	-999	-999	-999	-999	-999	-999	-999	-999	-999	-999	-999	-999	-999
B	A	CRL2	1	R4	24	0	0	0	0	0	0	0	0	0	0	0	0	0	1	0	4	0	0	0	0	0	0	0	0	0	0	5	1	0	0	0	0	0	0	0	1	0	0	0	0	12
B	A	CRL2	2	R1	10	0	0	0	0	0	0	0	0	0	0	0	0	0	4	0	5	0	0	0	0	0	0	0	0	0	0	1	0	0	0	0	0	0	0	0	0	0	0	0	0	0
B	A	CRL2	2	R2	23	0	0	0	0	0	0	0	0	0	0	0	0	1	10	0	8	0	0	0	0	0	0	0	0	0	0	0	0	0	0	0	0	0	1	0	1	0	0	0	0	2
B	A	CRL2	2	R3	-999	-999	-999	-999	-999	-999	-999	-999	-999	-999	-999	-999	-999	-999	-999	-999	-999	-999	-999	-999	-999	-999	-999	-999	-999	-999	-999	-999	-999	-999	-999	-999	-999	-999	-999	-999	-999	-999	-999	-999	-999	-999
B	A	CRL2	2	R4	27	0	0	0	0	0	0	0	0	0	0	0	0	0	2	7	6	0	0	0	0	0	0	0	0	1	0	2	2	0	0	0	0	0	0	0	3	0	0	0	0	4
B	A	CRL2	3	R1	36	0	0	0	0	0	0	0	0	8	0	0	0	3	7	0	14	0	0	0	1	0	0	0	0	0	0	3	0	0	0	0	0	0	0	0	0	0	0	0	0	0
B	A	CRL2	3	R2	32	0	0	0	0	0	0	0	0	2	0	0	0	5	15	0	8	0	0	0	1	0	0	0	0	0	0	0	0	0	0	0	0	0	0	0	0	0	0	0	0	1
B	A	CRL2	3	R3	-999	-999	-999	-999	-999	-999	-999	-999	-999	-999	-999	-999	-999	-999	-999	-999	-999	-999	-999	-999	-999	-999	-999	-999	-999	-999	-999	-999	-999	-999	-999	-999	-999	-999	-999	-999	-999	-999	-999	-999	-999	-999
B	A	CRL2	3	R4	24	0	0	0	0	0	0	0	0	0	0	0	0	0	0	0	2	0	0	0	0	0	0	0	0	0	0	0	8	0	0	0	0	0	0	0	4	0	0	0	0	10
B	A	CRL30	1	R1	36	0	0	0	0	0	0	0	0	8	0	1	0	3	12	0	8	0	0	0	1	0	0	0	0	0	0	0	0	0	1	0	1	0	0	0	0	0	0	0	0	1
B	A	CRL30	1	R2	15	1	0	0	0	0	0	0	0	3	0	0	0	1	3	0	5	0	0	0	0	0	0	0	0	0	1	0	0	0	0	0	0	0	1	0	0	0	0	0	0	0
B	A	CRL30	1	R3	-999	-999	-999	-999	-999	-999	-999	-999	-999	-999	-999	-999	-999	-999	-999	-999	-999	-999	-999	-999	-999	-999	-999	-999	-999	-999	-999	-999	-999	-999	-999	-999	-999	-999	-999	-999	-999	-999	-999	-999	-999	-999
B	A	CRL30	1	R4	18	0	0	0	0	0	0	0	0	0	0	0	0	0	0	0	0	0	0	0	0	0	0	0	0	0	0	2	7	0	0	0	0	0	0	0	9	0	0	0	0	0
B	A	CRL30	2	R1	19	1	0	0	0	0	0	0	0	9	0	0	0	0	3	0	2	0	0	0	0	0	0	0	0	0	0	2	0	0	0	0	0	0	0	0	0	0	0	1	0	1
B	A	CRL30	2	R2	25	0	0	0	0	0	0	0	0	5	0	0	0	0	2	0	14	0	0	0	0	0	0	0	0	0	2	1	0	0	0	0	0	0	0	0	1	0	0	0	0	0
B	A	CRL30	2	R3	-999	-999	-999	-999	-999	-999	-999	-999	-999	-999	-999	-999	-999	-999	-999	-999	-999	-999	-999	-999	-999	-999	-999	-999	-999	-999	-999	-999	-999	-999	-999	-999	-999	-999	-999	-999	-999	-999	-999	-999	-999	-999
B	A	CRL30	2	R4	30	0	0	0	0	0	0	0	0	0	0	0	0	0	2	3	0	0	0	0	0	0	0	0	0	0	0	0	18	0	0	0	0	0	0	0	5	0	0	0	0	2
B	A	CRL30	3	R1	15	0	0	0	0	0	0	0	0	3	0	0	0	0	8	0	0	0	0	0	0	0	0	0	0	0	1	1	0	0	1	0	0	0	1	0	0	0	0	0	0	0
B	A	CRL30	3	R2	14	0	0	0	0	0	0	0	0	2	0	0	0	2	4	0	4	0	0	0	0	0	0	0	0	0	0	1	0	0	0	0	0	0	0	0	1	0	0	0	0	0
B	A	CRL30	3	R3	-999	-999	-999	-999	-999	-999	-999	-999	-999	-999	-999	-999	-999	-999	-999	-999	-999	-999	-999	-999	-999	-999	-999	-999	-999	-999	-999	-999	-999	-999	-999	-999	-999	-999	-999	-999	-999	-999	-999	-999	-999	-999
B	A	CRL30	3	R4	22	0	0	0	0	0	0	0	0	0	0	0	0	2	0	0	1	0	0	0	0	0	0	0	0	0	0	1	10	0	0	0	0	0	0	0	1	0	0	0	0	7
B	A	H	1	R1	9	0	0	0	0	0	0	0	0	1	0	0	1	0	0	0	0	0	0	0	0	0	0	0	0	0	0	7	0	0	0	0	0	0	0	0	0	0	0	0	0	0
B	A	H	1	R2	8	0	0	0	0	0	0	0	0	1	0	0	0	1	2	0	0	0	0	0	0	0	0	0	0	0	0	4	0	0	0	0	0	0	0	0	0	0	0	0	0	0
B	A	H	1	R3	-999	-999	-999	-999	-999	-999	-999	-999	-999	-999	-999	-999	-999	-999	-999	-999	-999	-999	-999	-999	-999	-999	-999	-999	-999	-999	-999	-999	-999	-999	-999	-999	-999	-999	-999	-999	-999	-999	-999	-999	-999	-999
B	A	H	1	R4	68	0	0	0	0	0	0	0	0	4	0	0	0	0	0	0	60	0	0	0	0	0	0	0	0	0	0	0	0	0	0	0	0	0	0	0	0	0	0	0	0	4
B	A	H	2	R1	3	0	0	0	0	0	0	0	0	0	0	0	0	0	0	0	0	0	0	0	0	0	0	0	0	0	0	2	0	1	0	0	0	0	0	0	0	0	0	0	0	0
B	A	H	2	R2	5	0	0	0	0	0	0	0	0	0	0	0	0	0	2	0	0	0	0	0	0	0	0	0	0	0	0	3	0	0	0	0	0	0	0	0	0	0	0	0	0	0
B	A	H	2	R3	-999	-999	-999	-999	-999	-999	-999	-999	-999	-999	-999	-999	-999	-999	-999	-999	-999	-999	-999	-999	-999	-999	-999	-999	-999	-999	-999	-999	-999	-999	-999	-999	-999	-999	-999	-999	-999	-999	-999	-999	-999	-999
B	A	H	2	R4	35	0	0	0	0	0	0	0	0	0	0	0	0	0	1	0	29	0	0	0	0	0	0	0	0	0	0	0	0	0	0	0	0	0	0	0	0	0	0	0	0	5
B	A	H	3	R1	4	0	0	0	0	0	0	0	0	0	0	0	0	0	0	0	0	0	0	0	1	0	0	0	0	0	0	3	0	0	0	0	0	0	0	0	0	0	0	0	0	0
B	A	H	3	R2	18	0	0	0	0	0	0	0	0	5	0	0	1	3	2	0	1	0	0	0	0	0	0	0	0	0	1	4	0	0	0	0	0	0	0	0	0	0	0	0	0	1
B	A	H	3	R3	-999	-999	-999	-999	-999	-999	-999	-999	-999	-999	-999	-999	-999	-999	-999	-999	-999	-999	-999	-999	-999	-999	-999	-999	-999	-999	-999	-999	-999	-999	-999	-999	-999	-999	-999	-999	-999	-999	-999	-999	-999	-999
B	A	H	3	R4	19	0	0	0	0	0	0	0	0	4	0	0	0	0	0	0	12	0	0	0	0	0	0	0	0	0	0	2	0	0	0	0	0	0	0	0	0	0	0	0	0	1
B	B	CRL2	1	R1	65	0	0	0	0	0	0	0	0	4	0	1	0	3	8	0	34	0	0	0	0	0	0	0	0	0	1	7	3	0	0	0	4	0	0	0	0	0	0	0	0	0
B	B	CRL2	1	R2	6	0	0	0	0	0	0	0	0	5	0	0	0	0	1	0	0	0	0	0	0	0	0	0	0	0	0	0	0	0	0	0	0	0	0	0	0	0	0	0	0	0
B	B	CRL2	1	R3	140	0	0	0	0	0	0	0	0	8	0	1	0	8	0	3	59	0	0	0	0	0	0	0	0	0	6	0	0	0	0	0	3	0	0	0	52	0	0	0	0	0
B	B	CRL2	1	R4	23	0	0	0	0	0	0	0	0	0	0	0	0	2	3	2	5	0	0	0	0	0	0	0	0	0	0	1	6	0	0	0	0	0	0	0	0	0	0	1	0	3
B	B	CRL2	2	R1	20	0	0	0	0	0	0	0	0	2	0	0	0	0	3	0	10	0	0	0	0	0	0	0	0	0	0	2	0	1	0	0	0	0	0	0	2	0	0	0	0	0
B	B	CRL2	2	R2	15	1	0	0	0	0	0	0	0	6	0	0	0	3	0	0	3	0	0	0	0	0	0	0	0	0	1	0	0	0	0	0	0	0	0	0	1	0	0	0	0	0
B	B	CRL2	2	R3	145	0	0	0	0	0	0	0	0	6	0	0	0	7	7	0	26	0	0	0	0	0	0	0	0	0	7	0	0	0	0	0	0	0	2	0	88	2	0	0	0	0
B	B	CRL2	2	R4	22	0	0	0	0	0	0	0	0	0	0	0	0	1	0	3	3	0	0	0	0	0	0	0	0	0	0	3	10	0	0	0	0	0	0	0	0	0	0	0	0	2
B	B	CRL2	3	R1	16	0	0	0	0	0	0	0	0	1	0	2	0	0	5	0	7	0	0	0	0	0	0	0	0	0	0	1	0	0	0	0	0	0	0	0	0	0	0	0	0	0
B	B	CRL2	3	R2	48	2	0	0	0	0	0	0	0	17	0	0	0	0	5	0	7	0	0	0	0	0	0	0	0	0	2	0	0	0	0	0	0	0	1	0	12	1	0	1	0	0
B	B	CRL2	3	R3	189	1	0	0	0	0	0	0	0	13	0	0	0	7	0	0	26	0	0	0	0	0	0	0	0	0	9	0	0	0	0	0	0	0	1	0	129	2	0	0	0	1
B	B	CRL2	3	R4	16	0	0	0	0	0	0	0	0	0	0	0	0	1	0	2	3	0	0	0	0	0	0	0	0	0	0	1	7	0	0	0	0	0	0	0	0	0	0	0	0	2
B	B	CRL30	1	R1	19	0	0	0	0	0	0	0	0	1	0	0	0	4	2	0	7	0	0	0	0	0	0	0	0	0	0	4	0	0	0	0	1	0	0	0	0	0	0	0	0	0
B	B	CRL30	1	R2	97	1	0	0	0	0	0	0	0	18	0	0	0	2	2	0	12	0	0	0	0	1	0	0	0	0	0	0	0	0	0	1	3	0	1	0	55	0	0	0	0	1
B	B	CRL30	1	R3	234	1	0	0	0	1	0	0	0	15	0	0	0	2	4	2	54	0	0	0	0	0	0	0	0	0	0	0	0	0	0	0	1	0	0	0	153	1	0	0	0	0
B	B	CRL30	1	R4	22	0	0	0	0	0	0	0	0	0	0	0	0	0	1	0	0	0	0	0	0	0	0	0	0	0	0	0	16	0	0	0	0	0	0	0	0	0	0	0	0	5
B	B	CRL30	2	R1	42	0	0	0	0	0	0	0	0	5	0	0	0	3	15	0	6	0	0	0	0	0	0	0	0	0	0	7	0	0	0	0	4	0	1	0	0	0	0	0	0	1
B	B	CRL30	2	R2	61	2	0	0	0	0	0	0	0	10	0	0	0	0	0	0	1	0	0	0	0	0	0	0	0	0	0	0	0	0	0	0	7	0	0	0	41	0	0	0	0	0
B	B	CRL30	2	R3	170	0	0	0	0	0	0	0	0	6	0	0	0	3	0	0	14	0	0	0	0	0	0	0	0	0	3	0	0	0	0	0	2	0	0	0	140	2	0	0	0	0
B	B	CRL30	2	R4	17	0	0	0	0	0	0	0	0	0	0	0	0	0	2	0	0	0	0	0	0	0	0	0	0	0	0	1	3	0	0	0	0	0	0	0	2	0	0	0	0	9
B	B	CRL30	3	R1	24	0	0	0	0	0	0	0	0	4	0	0	0	0	5	0	6	0	0	0	0	0	0	0	0	0	1	6	0	1	0	0	0	0	0	0	1	0	0	0	0	0
B	B	CRL30	3	R2	49	0	0	0	0	0	0	0	0	8	0	0	0	0	1	0	1	0	0	0	0	0	0	0	0	0	0	1	0	0	0	0	0	0	0	0	34	4	0	0	0	0
B	B	CRL30	3	R3	141	0	0	0	0	0	0	0	0	4	0	0	0	0	0	0	29	0	0	0	0	0	0	0	0	0	3	0	0	0	0	0	1	0	2	0	101	1	0	0	0	0
B	B	CRL30	3	R4	18	0	0	0	0	0	0	0	0	0	0	0	0	1	0	1	0	0	0	0	0	0	0	0	0	0	0	2	6	0	0	0	0	0	0	0	0	0	0	0	0	8
B	B	G	1	R1	6	0	0	0	0	1	0	0	0	0	0	0	0	0	1	0	1	0	0	0	0	0	0	2	0	0	0	1	0	0	0	0	0	0	0	0	0	0	0	0	0	0
B	B	G	1	R2	5	0	0	0	0	0	0	0	0	4	0	0	0	0	0	0	0	0	0	0	0	0	0	0	0	0	0	0	0	0	0	0	0	0	0	0	1	0	0	0	0	0
B	B	G	1	R3	27	0	0	0	0	0	1	0	0	10	0	0	0	0	0	1	0	0	0	0	0	0	0	0	0	0	1	0	0	0	0	0	0	0	1	0	13	0	0	0	0	0
B	B	G	1	R4	5	0	0	0	0	0	0	1	0	0	0	0	0	0	0	0	1	0	0	0	0	0	0	0	0	0	0	0	0	0	0	0	0	0	0	0	0	0	0	1	0	2
B	B	G	2	R1	1	0	0	0	0	0	0	0	0	0	0	0	0	0	0	0	0	0	0	0	0	0	0	0	0	0	0	0	0	0	0	0	1	0	0	0	0	0	0	0	0	0
B	B	G	2	R2	8	0	0	0	0	0	0	0	0	7	0	0	0	0	0	0	0	0	0	0	0	0	0	0	0	0	0	0	0	0	0	0	0	0	0	0	0	0	0	1	0	0
B	B	G	2	R3	22	0	0	0	0	0	1	0	0	1	0	0	0	2	0	0	0	0	0	0	0	2	0	0	0	0	1	0	0	0	0	0	0	0	0	0	13	1	0	1	0	0
B	B	G	2	R4	5	0	0	0	0	0	0	0	0	1	0	0	0	0	1	0	1	0	0	0	0	0	0	0	0	0	0	0	0	0	0	0	0	0	0	0	0	0	0	0	0	2
B	B	G	3	R1	11	0	0	0	0	0	0	0	0	1	0	0	0	0	4	0	2	0	0	0	0	1	0	0	0	0	0	2	0	0	0	0	0	0	0	0	0	0	0	0	0	1
B	B	G	3	R2	29	0	1	0	0	0	0	0	0	15	0	0	0	0	3	0	3	0	0	0	0	0	0	0	0	0	0	0	0	0	0	0	0	0	0	0	5	2	0	0	0	0
B	B	G	3	R3	35	0	0	0	0	0	0	0	0	10	0	0	1	0	1	0	7	0	0	0	0	1	1	0	0	0	0	0	0	0	1	0	0	0	0	0	12	1	0	0	0	0
B	B	G	3	R4	9	0	0	0	0	0	0	0	0	1	0	0	0	0	3	1	4	0	0	0	0	0	0	0	0	0	0	0	0	0	0	0	0	0	0	0	0	0	0	0	0	0
B	C	CN	1	R1	16	0	0	0	0	0	0	0	0	0	0	0	0	0	16	0	0	0	0	0	0	0	0	0	0	0	0	0	0	0	0	0	0	0	0	0	0	0	0	0	0	0
B	C	CN	1	R2	12	2	0	0	0	0	0	0	0	2	0	0	0	0	2	0	0	0	0	0	0	1	0	0	0	0	1	0	0	0	0	0	0	0	1	3	0	0	0	0	0	0
B	C	CN	1	R3	21	0	0	0	0	0	0	0	0	0	0	0	0	1	0	0	0	0	0	0	0	0	0	0	0	0	1	0	0	0	0	0	0	0	0	17	2	0	0	0	0	0
B	C	CN	1	R4	1	0	0	0	0	0	0	0	0	1	0	0	0	0	0	0	0	0	0	0	0	0	0	0	0	0	0	0	0	0	0	0	0	0	0	0	0	0	0	0	0	0
B	C	CN	2	R1	0	0	0	0	0	0	0	0	0	0	0	0	0	0	0	0	0	0	0	0	0	0	0	0	0	0	0	0	0	0	0	0	0	0	0	0	0	0	0	0	0	0
B	C	CN	2	R2	3	0	0	0	0	0	0	0	0	1	0	0	0	1	0	0	0	0	0	0	0	0	0	0	0	0	0	0	0	0	0	0	0	0	0	0	0	0	0	0	0	1
B	C	CN	2	R3	11	0	0	0	0	0	0	0	0	0	0	0	0	0	0	0	0	0	0	0	0	0	0	0	0	0	0	0	0	0	0	0	0	0	0	11	0	0	0	0	0	0
B	C	CN	2	R4	2	0	0	0	0	0	0	0	0	0	0	0	0	0	0	0	0	0	0	0	0	0	0	0	0	0	0	0	0	0	0	0	0	0	2	0	0	0	0	0	0	0
B	C	CN	3	R1	17	0	0	0	0	0	0	0	0	1	0	0	0	3	8	3	0	0	0	0	0	1	0	0	0	0	0	0	0	0	0	0	0	0	0	1	0	0	0	0	0	0
B	C	CN	3	R2	6	1	0	0	0	0	0	0	0	1	0	0	0	1	0	0	0	0	0	1	0	0	0	0	0	0	0	0	0	0	0	0	0	0	1	1	0	0	0	0	0	0
B	C	CN	3	R3	24	0	0	0	0	0	0	0	0	0	0	0	0	0	0	1	0	0	0	0	0	0	0	0	0	0	0	0	0	0	0	0	0	0	0	22	1	0	0	0	0	0
B	C	CN	3	R4	3	0	0	0	0	1	0	0	0	0	0	0	0	1	0	0	0	0	0	0	0	0	0	0	0	0	0	0	0	0	0	0	0	0	0	0	0	0	0	0	0	1
B	C	CRL2	1	R1	-999	-999	-999	-999	-999	-999	-999	-999	-999	-999	-999	-999	-999	-999	-999	-999	-999	-999	-999	-999	-999	-999	-999	-999	-999	-999	-999	-999	-999	-999	-999	-999	-999	-999	-999	-999	-999	-999	-999	-999	-999	-999
B	C	CRL2	1	R2	18	6	0	0	0	0	0	0	0	10	0	0	0	0	0	0	0	0	0	0	0	0	0	0	0	0	1	0	0	0	0	0	0	0	1	0	0	0	0	0	0	0
B	C	CRL2	1	R3	13	0	0	0	0	0	0	0	0	2	0	0	0	0	1	0	0	0	0	0	0	0	0	0	0	0	4	0	0	0	0	0	0	0	0	0	1	5	0	0	0	0
B	C	CRL2	1	R4	29	0	0	0	0	0	0	0	0	0	0	0	0	0	0	3	16	0	0	0	0	0	0	0	0	0	0	2	2	0	0	0	0	0	0	0	1	0	0	0	0	5
B	C	CRL2	2	R1	3	0	0	0	0	0	0	0	0	2	0	0	0	0	0	0	0	0	0	0	0	0	0	0	0	0	0	0	0	0	0	0	0	0	1	0	0	0	0	0	0	0
B	C	CRL2	2	R2	15	4	0	0	0	0	0	0	0	9	0	0	0	0	0	0	0	0	0	0	0	0	0	0	0	0	0	0	0	0	0	0	1	0	1	0	0	0	0	0	0	0
B	C	CRL2	2	R3	17	0	0	0	0	0	0	0	0	3	0	0	0	0	0	3	2	0	0	0	0	1	0	0	0	0	0	0	0	0	0	0	1	1	0	0	2	4	0	0	0	0
B	C	CRL2	2	R4	23	0	0	0	0	0	0	0	0	0	0	0	0	0	2	3	4	0	0	0	0	0	0	0	0	0	0	2	4	0	0	0	2	0	0	0	1	0	0	0	0	5
B	C	CRL2	3	R1	12	0	0	0	0	0	0	0	0	3	0	0	0	0	4	0	1	0	0	0	0	1	0	0	0	0	0	1	0	0	1	0	1	0	0	0	0	0	0	0	0	0
B	C	CRL2	3	R2	9	0	0	0	0	0	0	0	0	3	0	0	0	0	0	0	0	0	0	0	0	0	0	0	0	0	3	0	0	0	0	0	1	0	0	0	1	1	0	0	0	0
B	C	CRL2	3	R3	20	0	0	0	0	0	0	0	0	2	0	0	0	0	1	0	1	0	0	0	0	0	0	0	0	0	1	0	0	0	0	0	0	0	2	0	2	11	0	0	0	0
B	C	CRL2	3	R4	18	0	0	0	0	0	0	0	0	0	0	0	0	0	1	0	5	0	0	0	0	0	0	0	0	0	0	0	1	0	0	0	2	0	0	0	1	0	0	0	0	8
B	C	CRL30	1	R1	20	0	0	0	0	0	0	0	0	5	0	0	0	0	7	0	1	0	0	0	0	0	0	0	0	0	0	4	2	0	1	0	0	0	0	0	0	0	0	0	0	0
B	C	CRL30	1	R2	15	0	0	0	0	0	0	0	0	6	0	0	0	2	0	0	4	0	0	0	0	0	0	0	0	0	3	0	0	0	0	0	0	0	0	0	0	0	0	0	0	0
B	C	CRL30	1	R3	39	0	0	0	0	0	0	0	0	3	0	0	0	0	1	0	3	0	0	0	0	0	0	0	0	0	4	0	0	0	0	0	2	0	0	0	9	17	0	0	0	0
B	C	CRL30	1	R4	11	0	0	0	0	0	0	0	0	0	0	0	0	0	0	0	0	0	0	0	0	0	0	0	0	0	0	1	3	0	0	0	0	0	0	0	2	0	0	0	0	5
B	C	CRL30	2	R1	10	0	0	0	0	0	0	0	0	3	0	2	0	0	3	0	1	0	0	0	0	0	0	0	0	0	1	0	0	0	0	0	0	0	0	0	0	0	0	0	0	0
B	C	CRL30	2	R2	16	0	0	0	0	0	0	0	0	6	0	0	0	1	0	0	0	0	0	0	0	0	0	0	0	0	8	0	0	0	0	0	0	0	0	0	1	0	0	0	0	0
B	C	CRL30	2	R3	28	0	0	0	0	0	0	0	0	3	0	0	0	0	3	0	1	0	0	0	0	0	0	0	0	0	1	0	0	0	0	0	0	0	2	0	6	12	0	0	0	0
B	C	CRL30	2	R4	32	0	0	0	0	0	0	0	0	0	0	0	0	2	0	1	0	0	0	0	0	0	0	0	0	0	0	4	19	0	0	0	0	0	0	0	2	0	0	0	0	4
B	C	CRL30	3	R1	6	0	0	0	0	0	0	0	0	2	0	0	0	0	2	0	0	0	0	0	0	0	0	0	0	0	1	1	0	0	0	0	0	0	0	0	0	0	0	0	0	0
B	C	CRL30	3	R2	18	0	0	0	0	0	0	0	0	6	1	0	0	0	0	0	3	0	0	0	0	0	0	0	0	0	1	0	0	0	0	0	1	0	0	0	3	3	0	0	0	0
B	C	CRL30	3	R3	28	0	0	0	0	0	0	0	0	7	0	0	0	0	0	0	0	0	0	0	0	0	0	0	0	0	2	0	0	0	0	0	2	0	2	0	6	9	0	0	0	0
B	C	CRL30	3	R4	29	0	0	0	0	0	0	0	0	0	0	0	0	0	0	1	0	0	0	0	0	0	0	0	0	0	0	3	5	0	0	0	0	0	0	0	5	0	0	0	0	15
B	C	H	1	R1	0	0	0	0	0	0	0	0	0	0	0	0	0	0	0	0	0	0	0	0	0	0	0	0	0	0	0	0	0	0	0	0	0	0	0	0	0	0	0	0	0	0
B	C	H	1	R2	0	0	0	0	0	0	0	0	0	0	0	0	0	0	0	0	0	0	0	0	0	0	0	0	0	0	0	0	0	0	0	0	0	0	0	0	0	0	0	0	0	0
B	C	H	1	R3	8	0	0	0	0	0	0	0	0	1	0	0	1	0	0	0	0	0	0	0	0	0	0	0	0	0	1	0	0	0	0	0	0	0	0	2	2	1	0	0	0	0
B	C	H	1	R4	6	0	0	0	0	0	0	0	0	0	0	0	0	0	1	0	3	0	0	0	0	0	0	0	0	0	0	1	0	1	0	0	0	0	0	0	0	0	0	0	0	0
B	C	H	2	R1	4	0	0	0	0	0	0	0	0	0	0	0	1	0	0	0	0	0	0	0	0	0	0	0	0	0	0	0	0	0	0	0	0	1	0	2	0	0	0	0	0	0
B	C	H	2	R2	2	0	0	0	0	0	0	0	0	1	0	0	0	0	0	0	0	0	0	0	0	0	0	0	0	0	0	0	0	0	0	0	0	0	0	0	0	0	0	0	1	0
B	C	H	2	R3	21	0	0	0	0	0	0	0	0	0	0	0	0	0	0	0	0	0	0	0	0	0	0	0	0	0	0	0	0	0	0	0	1	0	5	13	2	0	0	0	0	0
B	C	H	2	R4	0	0	0	0	0	0	0	0	0	0	0	0	0	0	0	0	0	0	0	0	0	0	0	0	0	0	0	0	0	0	0	0	0	0	0	0	0	0	0	0	0	0
B	C	H	3	R1	6	0	0	0	0	0	0	0	0	0	0	0	0	0	0	0	0	0	0	0	0	0	0	0	0	0	0	0	0	0	0	0	0	0	0	0	6	0	0	0	0	0
B	C	H	3	R2	1	0	1	0	0	0	0	0	0	0	0	0	0	0	0	0	0	0	0	0	0	0	0	0	0	0	0	0	0	0	0	0	0	0	0	0	0	0	0	0	0	0
B	C	H	3	R3	34	0	0	0	0	0	0	0	0	0	0	0	0	0	0	0	0	0	0	0	0	0	0	0	0	0	2	1	0	0	1	0	0	0	0	29	1	0	0	0	0	0
B	C	H	3	R4	1	0	0	0	0	0	0	0	0	1	0	0	0	0	0	0	0	0	0	0	0	0	0	0	0	0	0	0	0	0	0	0	0	0	0	0	0	0	0	0	0	0
B	D	CN	1	R1	30	0	0	0	0	0	0	0	0	0	0	0	0	3	5	0	5	0	0	0	0	0	0	0	0	0	0	8	7	0	1	0	0	0	0	0	0	0	0	0	0	1
B	D	CN	1	R2	1	0	0	0	0	0	0	0	0	0	0	0	0	0	0	0	1	0	0	0	0	0	0	0	0	0	0	0	0	0	0	0	0	0	0	0	0	0	0	0	0	0
B	D	CN	1	R3	0	0	0	0	0	0	0	0	0	0	0	0	0	0	0	0	0	0	0	0	0	0	0	0	0	0	0	0	0	0	0	0	0	0	0	0	0	0	0	0	0	0
B	D	CN	1	R4	13	0	0	0	0	0	0	0	0	0	0	0	0	0	0	0	0	0	0	0	0	0	0	0	1	0	0	2	9	0	0	0	0	0	0	0	0	0	0	0	0	1
B	D	CN	2	R1	30	0	0	0	0	0	0	0	0	0	0	1	0	2	7	0	1	0	0	0	0	0	0	0	0	0	0	14	5	0	0	0	0	0	0	0	0	0	0	0	0	0
B	D	CN	2	R2	14	0	0	0	0	0	0	0	0	4	0	0	0	1	5	1	3	0	0	0	0	0	0	0	0	0	0	0	0	0	0	0	0	0	0	0	0	0	0	0	0	0
B	D	CN	2	R3	5	0	0	0	0	0	0	0	0	0	0	0	0	1	0	0	0	0	0	0	0	0	0	0	0	0	2	0	0	0	1	0	0	0	0	0	1	0	0	0	0	0
B	D	CN	2	R4	2	0	0	0	0	0	0	0	0	0	0	0	0	0	0	0	0	0	0	0	0	0	0	0	0	0	0	1	1	0	0	0	0	0	0	0	0	0	0	0	0	0
B	D	CN	3	R1	31	0	0	0	0	0	0	0	0	0	0	0	0	0	4	0	1	0	0	0	0	0	0	0	0	0	0	10	12	0	0	0	1	0	2	1	0	0	0	0	0	0
B	D	CN	3	R2	0	0	0	0	0	0	0	0	0	0	0	0	0	0	0	0	0	0	0	0	0	0	0	0	0	0	0	0	0	0	0	0	0	0	0	0	0	0	0	0	0	0
B	D	CN	3	R3	11	0	0	0	0	0	0	0	0	1	0	0	0	0	0	0	0	0	0	0	0	0	0	0	0	0	0	0	0	0	0	0	0	0	1	0	6	3	0	0	0	0
B	D	CN	3	R4	1	0	0	0	0	0	0	0	0	0	0	0	0	0	0	0	0	0	0	0	0	0	0	0	0	0	0	0	0	0	0	0	0	0	0	0	1	0	0	0	0	0
B	D	CRL2	1	R1	57	0	0	0	0	0	0	0	0	3	0	0	0	0	1	0	0	0	0	0	0	0	0	0	0	0	1	32	18	0	0	0	0	0	2	0	0	0	0	0	0	0
B	D	CRL2	1	R2	7	1	0	0	0	0	0	0	0	4	0	0	0	0	0	0	0	0	0	0	0	0	0	0	0	0	2	0	0	0	0	0	0	0	0	0	0	0	0	0	0	0
B	D	CRL2	1	R3	20	0	0	0	0	0	0	0	0	0	0	0	0	0	0	0	3	0	0	0	0	0	0	0	0	0	7	0	0	0	0	0	0	0	0	0	10	0	0	0	0	0
B	D	CRL2	1	R4	14	0	0	0	0	0	0	0	0	0	0	0	0	0	0	0	0	0	0	0	0	0	0	0	0	0	0	2	10	0	0	0	0	0	0	0	1	0	0	0	0	1
B	D	CRL2	2	R1	34	0	0	0	0	0	0	0	0	1	0	0	0	0	3	0	0	0	0	0	0	0	0	0	0	0	0	22	6	0	0	0	0	0	1	1	0	0	0	0	0	0
B	D	CRL2	2	R2	6	0	0	0	0	0	0	0	0	1	0	0	0	0	0	0	0	0	0	0	0	0	0	0	0	0	3	0	0	0	0	0	0	0	2	0	0	0	0	0	0	0
B	D	CRL2	2	R3	18	0	0	0	0	0	0	0	0	0	0	0	0	0	0	1	0	0	0	0	0	0	0	0	0	0	1	0	0	0	1	0	0	0	1	0	13	1	0	0	0	0
B	D	CRL2	2	R4	11	0	0	0	0	0	0	0	0	0	0	0	0	0	0	0	0	0	0	0	0	0	0	0	0	0	0	2	6	0	0	0	0	0	0	0	0	0	0	0	0	3
B	D	CRL2	3	R1	7	0	0	0	0	0	0	0	0	2	0	0	0	0	0	0	0	0	0	0	0	0	0	0	0	0	0	3	0	0	0	0	0	0	2	0	0	0	0	0	0	0
B	D	CRL2	3	R2	4	1	0	0	0	0	0	0	0	1	0	0	0	0	1	0	0	0	0	0	0	0	0	0	0	0	0	0	0	0	0	0	0	0	0	0	0	0	0	0	0	1
B	D	CRL2	3	R3	6	0	0	0	0	0	0	0	0	0	0	0	0	0	0	1	0	0	0	0	0	0	0	0	0	0	0	0	0	0	0	0	0	0	0	0	4	1	0	0	0	0
B	D	CRL2	3	R4	18	0	0	0	0	0	0	0	0	0	0	0	0	0	1	0	0	0	0	0	0	0	0	0	0	0	0	1	13	0	0	0	0	0	0	0	0	0	0	0	0	3
B	D	CRL30	1	R1	24	0	0	0	0	0	0	0	0	1	0	0	0	0	0	0	0	0	0	0	0	0	0	0	0	0	0	10	13	0	0	0	0	0	0	0	0	0	0	0	0	0
B	D	CRL30	1	R2	12	0	0	0	0	0	0	0	0	3	0	0	0	0	0	0	0	0	0	0	0	0	0	0	0	0	1	0	0	0	0	0	0	0	0	0	8	0	0	0	0	0
B	D	CRL30	1	R3	24	0	0	0	0	0	0	0	0	0	0	0	0	2	0	0	0	0	0	0	0	0	0	0	0	0	3	0	0	0	0	0	0	0	2	0	17	0	0	0	0	0
B	D	CRL30	1	R4	26	0	0	0	0	0	0	0	0	0	0	0	0	1	0	0	0	0	0	0	0	0	0	0	0	0	0	3	18	0	0	0	0	0	0	0	0	0	0	0	0	4
B	D	CRL30	2	R1	51	0	0	0	0	0	0	0	0	2	0	0	0	0	0	0	0	0	0	0	0	0	0	0	0	0	0	23	25	0	0	0	0	0	1	0	0	0	0	0	0	0
B	D	CRL30	2	R2	10	0	0	0	0	0	0	0	0	4	0	0	0	1	1	0	1	0	0	0	0	0	0	0	0	0	0	0	0	0	0	0	0	0	2	0	1	0	0	0	0	0
B	D	CRL30	2	R3	44	0	0	0	0	0	0	0	0	0	0	0	0	2	0	1	2	0	0	0	0	0	0	0	0	0	4	0	0	0	0	0	0	0	2	1	32	0	0	0	0	0
B	D	CRL30	2	R4	28	0	0	0	0	0	0	0	0	0	0	0	0	0	0	0	0	0	0	0	0	0	0	0	0	0	0	4	20	0	0	0	0	0	0	0	1	0	0	0	0	3
B	D	CRL30	3	R1	30	0	0	0	0	0	0	0	0	3	0	0	0	0	0	0	0	0	0	0	0	0	0	0	0	0	0	21	5	0	0	0	0	0	1	0	0	0	0	0	0	0
B	D	CRL30	3	R2	5	3	0	0	0	0	0	0	0	0	0	0	0	0	0	0	1	0	0	0	0	0	0	0	0	0	0	0	0	0	0	0	0	0	0	0	1	0	0	0	0	0
B	D	CRL30	3	R3	43	0	0	0	0	0	0	0	0	2	0	0	0	0	0	0	2	0	0	0	0	0	0	0	0	0	8	0	0	0	0	0	0	0	0	0	31	0	0	0	0	0
B	D	CRL30	3	R4	22	0	0	0	0	0	0	0	0	0	0	0	0	0	0	0	0	0	0	0	0	0	0	0	0	0	0	3	16	0	0	0	0	0	0	0	1	0	0	0	0	2
B	D	G	1	R1	15	0	0	0	0	0	0	0	0	0	0	0	0	0	1	0	0	0	0	0	0	0	0	0	0	0	0	11	0	0	0	0	0	1	1	0	1	0	0	0	0	0
B	D	G	1	R2	1	0	0	0	0	0	0	0	0	1	0	0	0	0	0	0	0	0	0	0	0	0	0	0	0	0	0	0	0	0	0	0	0	0	0	0	0	0	0	0	0	0
B	D	G	1	R3	2	0	0	0	0	0	0	0	0	0	0	0	0	1	0	0	0	0	0	0	0	0	0	0	0	0	1	0	0	0	0	0	0	0	0	0	0	0	0	0	0	0
B	D	G	1	R4	1	0	0	0	0	0	0	0	0	0	0	0	0	0	0	0	0	0	0	0	0	0	0	0	0	0	0	0	0	0	0	0	0	0	0	0	0	0	0	0	0	1
B	D	G	2	R1	9	0	0	0	0	0	0	0	0	1	0	0	0	0	3	0	0	0	0	0	0	0	0	0	0	0	1	3	0	0	1	0	0	0	0	0	0	0	0	0	0	0
B	D	G	2	R2	5	0	0	0	0	0	0	0	0	4	0	0	0	0	0	0	0	0	0	0	0	0	0	0	0	0	1	0	0	0	0	0	0	0	0	0	0	0	0	0	0	0
B	D	G	2	R3	4	0	0	0	0	0	0	0	0	0	0	0	0	0	1	0	0	0	0	0	0	0	0	0	0	0	1	0	0	0	0	0	0	0	0	0	2	0	0	0	0	0
B	D	G	2	R4	4	0	0	0	0	0	0	0	0	1	0	0	0	1	0	0	1	0	0	0	0	0	0	0	1	0	0	0	0	0	0	0	0	0	0	0	0	0	0	0	0	0
B	D	G	3	R1	7	0	0	0	0	0	0	0	0	1	0	0	0	0	4	0	0	0	0	0	0	0	0	0	0	0	0	1	0	1	0	0	0	0	0	0	0	0	0	0	0	0
B	D	G	3	R2	1	0	0	0	0	0	0	0	0	1	0	0	0	0	0	0	0	0	0	0	0	0	0	0	0	0	0	0	0	0	0	0	0	0	0	0	0	0	0	0	0	0
B	D	G	3	R3	5	0	0	0	0	0	0	0	0	0	0	0	0	0	0	0	1	0	0	0	0	0	0	0	0	0	0	0	0	0	0	0	0	0	1	0	2	1	0	0	0	0
B	D	G	3	R4	1	0	0	0	0	0	0	0	0	0	0	0	0	0	0	0	1	0	0	0	0	0	0	0	0	0	0	0	0	0	0	0	0	0	0	0	0	0	0	0	0	0
P	A	CRL2	1	R1	30	0	0	0	0	0	0	0	0	12	0	5	0	0	8	0	1	0	0	0	2	0	0	0	0	0	0	1	0	0	0	0	1	0	0	0	0	0	0	0	0	0
P	A	CRL2	1	R2	17	0	0	0	0	0	0	0	0	3	0	0	0	2	5	0	0	0	0	0	0	0	0	0	0	0	3	0	0	0	1	0	0	0	0	0	1	0	0	1	0	1
P	A	CRL2	1	R3	21	0	0	0	0	0	0	0	0	7	0	0	0	7	4	0	0	0	0	0	0	0	0	0	0	0	1	0	0	0	0	0	0	0	0	0	1	1	0	0	0	0
P	A	CRL2	1	R4	10	0	0	0	0	0	0	0	0	0	0	0	0	1	0	0	0	0	0	0	0	0	0	0	0	0	0	0	4	0	0	0	0	0	0	0	0	0	0	0	0	5
P	A	CRL2	2	R1	2	0	0	0	0	0	0	0	0	0	0	0	0	0	2	0	0	0	0	0	0	0	0	0	0	0	0	0	0	0	0	0	0	0	0	0	0	0	0	0	0	0
P	A	CRL2	2	R2	11	0	0	0	0	0	0	0	0	7	0	0	0	0	0	0	0	0	0	0	0	0	0	0	0	0	0	0	0	0	0	0	0	0	0	0	4	0	0	0	0	0
P	A	CRL2	2	R3	33	1	0	0	0	0	0	0	0	4	0	0	0	10	13	0	1	0	0	0	0	0	0	0	0	0	2	0	0	0	0	0	0	0	0	0	1	0	0	0	0	1
P	A	CRL2	2	R4	12	0	0	0	0	0	0	0	0	0	0	0	0	0	0	0	0	0	0	0	1	0	0	0	0	0	0	0	9	0	0	0	0	0	0	0	1	0	0	0	0	1
P	A	CRL2	3	R1	19	0	0	0	0	0	0	0	0	1	0	1	0	7	5	0	0	0	0	0	1	0	0	0	0	0	2	2	0	0	0	0	0	0	0	0	0	0	0	0	0	0
P	A	CRL2	3	R2	11	0	0	0	0	0	0	0	0	1	0	0	0	0	2	0	0	0	0	0	0	0	0	0	0	0	1	0	0	0	0	0	1	0	0	0	6	0	0	0	0	0
P	A	CRL2	3	R3	29	0	0	0	0	0	0	0	0	7	0	0	0	8	4	0	2	0	0	0	0	0	0	0	0	0	2	0	0	0	0	0	0	0	0	0	3	1	0	0	0	2
P	A	CRL2	3	R4	12	0	0	0	0	0	0	0	0	0	0	0	0	0	0	0	0	0	0	0	0	0	0	0	0	0	0	0	12	0	0	0	0	0	0	0	0	0	0	0	0	0
P	A	CRL30	1	R1	18	0	0	0	0	0	0	0	0	3	0	0	0	2	6	0	2	0	0	0	1	0	0	0	0	0	1	3	0	0	0	0	0	0	0	0	0	0	0	0	0	0
P	A	CRL30	1	R2	9	0	0	0	0	0	0	0	0	4	0	0	0	0	2	0	0	0	0	0	0	0	0	0	0	0	1	1	0	0	0	0	1	0	0	0	0	0	0	0	0	0
P	A	CRL30	1	R3	17	0	0	0	0	0	0	1	0	9	0	0	0	0	1	0	0	0	0	0	0	0	0	0	0	0	3	0	0	0	0	0	1	0	0	0	1	0	0	0	0	1
P	A	CRL30	1	R4	20	0	0	0	0	0	0	0	0	0	0	0	0	0	1	0	0	0	0	0	0	0	0	0	0	0	1	1	13	0	0	0	0	0	0	0	0	0	0	0	0	4
P	A	CRL30	2	R1	21	0	0	0	0	0	0	0	0	9	0	0	0	0	2	0	1	0	0	0	1	0	0	0	0	0	2	4	0	0	0	0	2	0	0	0	0	0	0	0	0	0
P	A	CRL30	2	R2	2	0	0	0	0	0	0	0	0	1	0	0	0	0	0	0	1	0	0	0	0	0	0	0	0	0	0	0	0	0	0	0	0	0	0	0	0	0	0	0	0	0
P	A	CRL30	2	R3	8	0	0	0	0	0	0	0	0	2	0	0	0	1	0	0	1	0	0	0	0	0	0	0	0	0	1	0	0	0	0	0	0	0	0	0	2	1	0	0	0	0
P	A	CRL30	2	R4	15	0	0	0	0	0	0	0	0	0	0	0	0	1	0	0	0	0	0	0	0	0	0	0	0	0	0	1	8	0	0	0	0	0	0	0	0	0	0	0	0	5
P	A	CRL30	3	R1	39	1	0	0	0	0	0	0	0	10	0	2	0	5	12	0	2	0	0	0	0	0	0	0	0	0	2	2	0	0	0	0	3	0	0	0	0	0	0	0	0	0
P	A	CRL30	3	R2	11	0	0	0	0	0	0	0	0	6	0	0	0	0	2	0	2	0	0	0	0	0	0	0	0	0	0	0	0	0	0	0	0	0	0	0	0	0	0	0	0	1
P	A	CRL30	3	R3	30	0	0	0	0	0	0	0	0	5	0	0	0	10	4	0	0	0	0	0	0	0	0	0	0	0	7	0	0	0	0	0	1	0	0	0	3	0	0	0	0	0
P	A	CRL30	3	R4	27	0	0	0	0	0	0	0	0	0	0	0	0	0	0	0	0	0	0	0	0	0	0	0	0	0	0	3	13	0	0	0	0	0	0	0	7	0	0	0	0	4
P	A	H	1	R1	2	0	1	0	0	1	0	0	0	0	0	0	0	0	0	0	0	0	0	0	0	0	0	0	0	0	0	0	0	0	0	0	0	0	0	0	0	0	0	0	0	0
P	A	H	1	R2	2	0	0	0	0	0	1	0	0	0	0	0	0	0	0	0	0	0	0	0	0	0	0	0	0	0	0	0	0	1	0	0	0	0	0	0	0	0	0	0	0	0
P	A	H	1	R3	0	0	0	0	0	0	0	0	0	0	0	0	0	0	0	0	0	0	0	0	0	0	0	0	0	0	0	0	0	0	0	0	0	0	0	0	0	0	0	0	0	0
P	A	H	1	R4	3	0	2	0	0	0	0	0	0	1	0	0	0	0	0	0	0	0	0	0	0	0	0	0	0	0	0	0	0	0	0	0	0	0	0	0	0	0	0	0	0	0
P	A	H	2	R1	0	0	0	0	0	0	0	0	0	0	0	0	0	0	0	0	0	0	0	0	0	0	0	0	0	0	0	0	0	0	0	0	0	0	0	0	0	0	0	0	0	0
P	A	H	2	R2	0	0	0	0	0	0	0	0	0	0	0	0	0	0	0	0	0	0	0	0	0	0	0	0	0	0	0	0	0	0	0	0	0	0	0	0	0	0	0	0	0	0
P	A	H	2	R3	0	0	0	0	0	0	0	0	0	0	0	0	0	0	0	0	0	0	0	0	0	0	0	0	0	0	0	0	0	0	0	0	0	0	0	0	0	0	0	0	0	0
P	A	H	2	R4	2	0	0	0	0	0	0	0	0	0	0	0	0	1	0	0	0	0	0	0	0	0	0	0	0	0	0	0	0	0	0	0	0	0	0	0	1	0	0	0	0	0
P	A	H	3	R1	4	0	0	0	0	0	0	0	0	0	0	0	0	0	0	0	0	0	0	0	0	0	0	0	0	0	0	1	2	0	0	0	0	0	0	0	1	0	0	0	0	0
P	A	H	3	R2	3	0	0	0	0	0	0	0	0	0	0	0	1	1	0	0	0	0	0	0	0	0	0	0	0	0	0	0	0	0	0	0	0	0	0	0	1	0	0	0	0	0
P	A	H	3	R3	9	0	0	0	0	0	0	0	0	0	0	0	0	0	0	0	0	1	0	0	0	0	0	0	0	0	1	0	0	0	0	0	0	0	0	0	1	0	0	0	0	6
P	A	H	3	R4	0	0	0	0	0	0	0	0	0	0	0	0	0	0	0	0	0	0	0	0	0	0	0	0	0	0	0	0	0	0	0	0	0	0	0	0	0	0	0	0	0	0
P	B	CRL2	1	R1	10	0	0	0	0	0	0	0	0	1	0	0	0	0	4	0	1	0	0	0	0	0	0	0	0	0	0	1	0	0	2	0	0	0	0	0	0	0	0	0	0	1
P	B	CRL2	1	R2	10	0	0	0	0	0	0	0	0	2	0	0	0	0	0	0	2	0	0	0	0	0	0	0	0	0	1	5	0	0	0	0	0	0	0	0	0	0	0	0	0	0
P	B	CRL2	1	R3	20	0	0	0	0	0	0	0	0	0	0	0	0	0	1	0	4	0	0	0	0	0	0	0	0	0	7	0	0	0	0	0	0	0	0	0	6	0	0	0	0	2
P	B	CRL2	1	R4	16	0	0	0	0	0	0	0	0	0	0	0	0	0	0	1	0	0	0	0	0	0	0	0	0	0	0	1	4	0	0	0	0	0	0	0	0	0	0	0	0	10
P	B	CRL2	2	R1	18	0	0	0	0	0	0	0	0	3	0	1	0	0	4	0	3	0	0	0	0	0	0	0	0	0	0	5	2	0	0	0	0	0	0	0	0	0	0	0	0	0
P	B	CRL2	2	R2	15	0	0	0	0	0	0	0	0	3	0	2	0	0	0	0	0	0	0	0	0	0	0	0	0	0	4	3	0	0	1	0	0	0	1	0	0	1	0	0	0	0
P	B	CRL2	2	R3	18	0	0	0	0	0	0	0	0	1	0	0	0	0	0	0	3	0	0	0	0	1	0	0	0	0	5	1	0	0	0	0	0	0	0	0	4	1	0	0	0	2
P	B	CRL2	2	R4	5	0	0	0	0	0	0	0	0	0	0	0	0	0	0	1	0	0	0	0	0	0	0	0	0	0	0	1	0	0	0	0	0	0	1	0	1	0	0	0	0	1
P	B	CRL2	3	R1	13	0	0	0	0	1	0	0	0	3	0	1	0	0	2	0	0	0	0	0	0	0	0	0	0	0	0	3	0	0	1	0	0	0	0	0	0	0	1	0	0	1
P	B	CRL2	3	R2	18	0	0	0	0	0	0	0	0	5	0	0	0	0	0	0	3	0	0	0	0	0	0	0	0	0	1	5	0	0	1	0	0	0	0	0	0	2	0	1	0	0
P	B	CRL2	3	R3	11	0	0	0	0	0	0	0	0	0	0	0	0	1	0	0	4	0	0	0	0	0	0	0	0	0	5	0	0	0	0	0	0	0	0	0	1	0	0	0	0	0
P	B	CRL2	3	R4	12	0	0	0	0	0	0	0	0	0	0	0	0	0	0	0	0	0	0	0	0	0	0	0	0	0	0	3	0	0	0	0	0	0	0	0	3	0	0	0	0	6
P	B	CRL30	1	R1	19	0	0	0	0	0	0	0	0	2	0	0	0	0	2	0	0	0	0	0	0	0	0	0	0	0	1	7	3	0	4	0	0	0	0	0	0	0	0	0	0	0
P	B	CRL30	1	R2	2	0	0	0	0	0	0	0	0	0	0	0	0	0	0	0	2	0	0	0	0	0	0	0	0	0	0	0	0	0	0	0	0	0	0	0	0	0	0	0	0	0
P	B	CRL30	1	R3	26	0	0	0	0	0	0	0	0	0	0	0	0	1	0	1	4	0	0	0	0	1	0	0	0	0	4	0	0	0	1	0	1	0	0	0	11	1	0	0	0	1
P	B	CRL30	1	R4	11	0	0	0	0	0	0	0	0	0	0	0	0	0	0	0	0	0	0	0	0	0	0	0	0	0	0	0	1	0	0	0	0	0	0	0	0	0	0	0	0	10
P	B	CRL30	2	R1	11	0	0	0	0	0	0	0	0	0	0	0	0	0	4	0	0	0	0	0	0	0	0	0	0	0	1	5	0	0	1	0	0	0	0	0	0	0	0	0	0	0
P	B	CRL30	2	R2	7	0	0	0	0	0	0	0	0	2	0	0	0	0	0	0	2	0	0	0	0	0	0	0	0	0	1	1	0	0	0	0	0	0	0	0	1	0	0	0	0	0
P	B	CRL30	2	R3	22	0	0	0	0	0	0	0	0	3	0	0	0	1	0	0	1	0	0	0	0	0	0	0	0	0	5	0	0	0	0	0	0	0	1	0	10	0	0	0	0	1
P	B	CRL30	2	R4	22	0	0	0	0	0	0	0	0	0	0	0	0	0	0	0	1	0	0	0	0	0	0	0	0	0	0	2	7	0	0	0	0	0	0	0	0	0	0	0	0	12
P	B	CRL30	3	R1	19	0	0	0	0	0	0	0	0	1	0	1	0	2	0	0	1	0	0	0	0	0	0	0	0	0	0	6	4	0	4	0	0	0	0	0	0	0	0	0	0	0
P	B	CRL30	3	R2	11	0	0	0	0	0	0	0	0	8	0	0	0	0	1	0	1	0	0	0	0	0	0	0	0	0	0	1	0	0	0	0	0	0	0	0	0	0	0	0	0	0
P	B	CRL30	3	R3	10	0	0	0	0	0	0	0	0	0	0	0	0	0	0	0	2	0	0	0	0	0	0	0	0	0	5	0	0	0	0	0	0	0	0	0	3	0	0	0	0	0
P	B	CRL30	3	R4	13	0	0	0	0	0	0	0	0	1	0	0	0	0	0	0	0	0	0	0	0	0	0	0	0	0	0	1	3	0	0	0	0	0	0	0	1	0	0	0	0	7
P	B	G	1	R1	3	0	0	0	0	0	0	0	0	0	0	1	0	0	0	0	0	0	0	0	0	0	0	0	0	0	0	2	0	0	0	0	0	0	0	0	0	0	0	0	0	0
P	B	G	1	R2	3	0	1	0	0	0	0	1	0	0	0	0	0	0	0	0	0	0	0	0	0	0	0	0	0	0	0	1	0	0	0	0	0	0	0	0	0	0	0	0	0	0
P	B	G	1	R3	1	0	0	0	0	0	0	0	0	0	0	0	0	0	0	0	0	0	0	0	0	0	0	0	0	0	0	0	0	0	0	0	0	0	0	0	1	0	0	0	0	0
P	B	G	1	R4	15	0	0	0	0	0	0	1	0	1	0	0	0	0	0	0	2	0	0	0	0	0	0	0	0	0	0	0	3	0	0	0	0	0	0	0	0	0	0	0	0	8
P	B	G	2	R1	3	0	0	0	0	0	0	0	0	0	0	0	0	0	0	0	0	0	0	0	0	0	0	0	0	0	0	1	0	0	0	0	0	0	0	0	0	0	2	0	0	0
P	B	G	2	R2	11	0	3	0	0	0	0	4	0	1	0	0	0	0	0	0	0	0	0	0	0	1	0	0	0	0	0	1	0	0	0	0	0	0	1	0	0	0	0	0	0	0
P	B	G	2	R3	6	0	0	0	0	0	0	0	0	1	0	0	0	0	0	0	2	0	0	0	0	0	0	0	0	0	0	0	0	0	0	0	0	0	0	0	3	0	0	0	0	0
P	B	G	2	R4	19	0	0	0	0	0	0	0	0	0	0	0	0	0	0	0	10	0	0	0	0	0	0	0	0	0	0	0	2	0	0	0	0	0	0	0	0	0	0	1	0	6
P	B	G	3	R1	1	0	0	0	0	0	1	0	0	0	0	0	0	0	0	0	0	0	0	0	0	0	0	0	0	0	0	0	0	0	0	0	0	0	0	0	0	0	0	0	0	0
P	B	G	3	R2	8	0	3	0	0	0	0	0	0	0	0	0	0	0	0	0	1	0	0	0	0	0	0	0	0	0	0	3	0	0	0	0	0	0	0	0	0	0	1	0	0	0
P	B	G	3	R3	0	0	0	0	0	0	0	0	0	0	0	0	0	0	0	0	0	0	0	0	0	0	0	0	0	0	0	0	0	0	0	0	0	0	0	0	0	0	0	0	0	0
P	B	G	3	R4	3	0	0	0	0	0	0	0	0	0	0	0	0	0	0	0	3	0	0	0	0	0	0	0	0	0	0	0	0	0	0	0	0	0	0	0	0	0	0	0	0	0
P	C	CN	1	R1	19	0	0	0	0	1	0	0	0	0	0	0	0	0	4	6	6	0	0	0	0	0	0	0	0	0	0	0	0	0	0	0	0	0	2	0	0	0	0	0	0	0
P	C	CN	1	R2	12	0	0	0	0	0	0	0	0	0	0	0	0	0	1	2	0	0	0	0	0	0	0	0	0	0	0	0	0	0	0	0	1	1	1	0	6	0	0	0	0	0
P	C	CN	1	R3	24	0	0	0	0	0	0	0	0	1	0	1	0	0	0	3	1	0	0	0	0	0	0	0	0	0	2	0	0	0	0	0	1	0	0	1	13	1	0	0	0	0
P	C	CN	1	R4	9	0	0	0	0	0	0	0	0	0	0	0	0	0	1	0	5	0	0	0	0	0	0	0	0	0	0	0	1	0	0	0	1	0	0	0	0	0	0	0	0	1
P	C	CN	2	R1	10	0	0	0	0	0	0	0	0	0	1	0	0	0	2	1	2	0	0	0	1	0	0	0	0	0	0	1	0	0	0	0	0	0	2	0	0	0	0	0	0	0
P	C	CN	2	R2	11	2	0	0	0	0	0	0	0	0	0	0	0	0	2	0	2	0	0	0	0	0	0	0	0	0	0	1	0	0	0	0	3	0	1	0	0	0	0	0	0	0
P	C	CN	2	R3	24	0	0	0	0	0	0	0	0	2	0	2	0	2	0	4	0	0	0	0	0	0	0	0	0	0	1	0	0	0	0	0	6	0	0	0	7	0	0	0	0	0
P	C	CN	2	R4	10	0	0	0	0	0	0	0	0	1	1	0	0	0	0	0	5	0	0	0	0	0	0	0	1	0	0	0	0	0	0	0	0	0	0	0	1	0	0	0	0	1
P	C	CN	3	R1	15	0	0	0	0	0	0	0	0	0	0	0	0	1	2	8	1	0	0	0	0	0	0	0	0	0	0	0	0	0	0	0	1	0	2	0	0	0	0	0	0	0
P	C	CN	3	R2	13	1	0	0	0	0	0	0	0	1	0	0	0	0	1	4	1	0	0	0	0	0	0	0	0	0	0	0	0	0	0	0	2	0	0	0	3	0	0	0	0	0
P	C	CN	3	R3	15	0	0	0	0	0	0	0	0	1	0	0	0	0	0	0	0	0	0	0	0	0	0	0	0	0	1	0	0	0	0	0	10	0	0	0	3	0	0	0	0	0
P	C	CN	3	R4	30	0	0	0	0	0	0	0	0	0	0	0	0	0	3	3	11	0	0	0	0	0	0	0	1	0	0	1	6	0	0	0	4	0	0	0	1	0	0	0	0	0
P	C	CRL2	1	R1	13	0	0	0	0	0	0	0	0	0	0	0	0	1	3	0	1	0	0	0	0	1	0	0	0	0	1	2	0	0	0	0	1	0	2	0	0	0	0	0	0	1
P	C	CRL2	1	R2	20	0	0	0	0	0	0	0	0	1	1	0	0	0	1	0	1	0	0	0	0	1	0	0	0	0	4	0	0	0	0	0	1	0	4	0	6	0	0	0	0	0
P	C	CRL2	1	R3	38	0	0	0	0	0	0	0	0	1	0	1	0	0	0	1	16	0	0	0	0	0	0	0	0	0	3	0	0	0	0	0	2	0	4	0	9	1	0	0	0	0
P	C	CRL2	1	R4	-999	-999	-999	-999	-999	-999	-999	-999	-999	-999	-999	-999	-999	-999	-999	-999	-999	-999	-999	-999	-999	-999	-999	-999	-999	-999	-999	-999	-999	-999	-999	-999	-999	-999	-999	-999	-999	-999	-999	-999	-999	-999
P	C	CRL2	2	R1	26	0	0	0	0	0	0	0	0	6	0	0	0	2	5	0	3	0	0	0	2	0	0	0	0	0	2	0	0	0	0	0	1	0	5	0	0	0	0	0	0	0
P	C	CRL2	2	R2	22	0	0	0	0	0	0	0	0	6	0	0	0	0	3	0	4	0	0	0	0	0	0	0	0	0	1	0	0	0	0	0	2	0	1	0	4	0	0	1	0	0
P	C	CRL2	2	R3	59	0	0	0	0	0	0	0	0	3	0	0	0	3	1	1	17	0	0	0	0	0	0	0	0	0	6	0	0	0	0	0	1	0	2	0	19	5	0	0	0	1
P	C	CRL2	2	R4	-999	-999	-999	-999	-999	-999	-999	-999	-999	-999	-999	-999	-999	-999	-999	-999	-999	-999	-999	-999	-999	-999	-999	-999	-999	-999	-999	-999	-999	-999	-999	-999	-999	-999	-999	-999	-999	-999	-999	-999	-999	-999
P	C	CRL2	3	R1	24	0	0	0	0	0	0	0	0	7	0	0	0	0	1	0	0	0	0	0	1	0	0	0	0	0	0	2	1	0	1	0	1	0	10	0	0	0	0	0	0	0
P	C	CRL2	3	R2	9	0	0	0	0	0	0	0	0	3	0	0	0	0	0	0	1	0	0	0	0	0	0	0	0	0	1	0	0	0	0	0	2	0	0	0	1	0	1	0	0	0
P	C	CRL2	3	R3	30	0	0	0	0	0	0	0	0	0	0	0	0	0	0	0	6	0	0	0	0	0	0	0	0	0	0	0	0	0	0	0	1	0	4	0	11	8	0	0	0	0
P	C	CRL2	3	R4	-999	-999	-999	-999	-999	-999	-999	-999	-999	-999	-999	-999	-999	-999	-999	-999	-999	-999	-999	-999	-999	-999	-999	-999	-999	-999	-999	-999	-999	-999	-999	-999	-999	-999	-999	-999	-999	-999	-999	-999	-999	-999
P	C	CRL30	1	R1	16	0	0	0	0	0	0	0	0	1	0	0	0	0	7	0	1	0	0	0	0	0	0	0	0	0	0	3	0	0	0	1	1	1	1	0	0	0	0	0	0	0
P	C	CRL30	1	R2	14	0	0	0	0	0	0	0	0	0	0	0	0	0	0	0	0	0	0	0	0	0	0	0	0	0	0	0	0	0	0	0	0	0	1	0	12	1	0	0	0	0
P	C	CRL30	1	R3	39	0	0	0	0	0	0	0	0	0	0	0	0	1	0	0	6	0	0	0	0	0	0	0	0	0	1	0	0	0	0	0	0	0	2	0	25	4	0	0	0	0
P	C	CRL30	1	R4	-999	-999	-999	-999	-999	-999	-999	-999	-999	-999	-999	-999	-999	-999	-999	-999	-999	-999	-999	-999	-999	-999	-999	-999	-999	-999	-999	-999	-999	-999	-999	-999	-999	-999	-999	-999	-999	-999	-999	-999	-999	-999
P	C	CRL30	2	R1	26	0	0	0	0	0	0	0	0	5	0	0	0	0	4	0	0	0	0	0	0	0	0	0	0	0	0	7	4	0	0	0	1	0	5	0	0	0	0	0	0	0
P	C	CRL30	2	R2	14	0	0	0	0	0	0	0	0	0	0	0	0	0	0	0	0	0	0	0	0	0	0	0	0	0	0	0	0	0	0	0	0	0	3	0	11	0	0	0	0	0
P	C	CRL30	2	R3	26	0	0	0	0	0	0	0	0	0	0	0	0	1	0	0	7	0	0	0	0	0	0	0	0	0	1	0	0	0	0	0	0	0	0	0	15	2	0	0	0	0
P	C	CRL30	2	R4	-999	-999	-999	-999	-999	-999	-999	-999	-999	-999	-999	-999	-999	-999	-999	-999	-999	-999	-999	-999	-999	-999	-999	-999	-999	-999	-999	-999	-999	-999	-999	-999	-999	-999	-999	-999	-999	-999	-999	-999	-999	-999
P	C	CRL30	3	R1	11	0	0	0	0	0	0	0	0	1	0	0	0	0	1	0	0	0	0	0	0	0	0	0	0	0	0	3	0	0	1	0	3	0	2	0	0	0	0	0	0	0
P	C	CRL30	3	R2	25	0	0	0	0	0	0	0	0	0	0	0	0	0	2	0	0	0	0	0	0	0	0	0	0	0	2	0	0	0	0	0	4	0	0	0	15	2	0	0	0	0
P	C	CRL30	3	R3	43	0	0	0	0	0	0	0	0	0	0	0	0	0	0	2	8	0	0	0	0	0	0	0	0	0	4	0	0	0	0	0	2	0	0	0	25	2	0	0	0	0
P	C	CRL30	3	R4	-999	-999	-999	-999	-999	-999	-999	-999	-999	-999	-999	-999	-999	-999	-999	-999	-999	-999	-999	-999	-999	-999	-999	-999	-999	-999	-999	-999	-999	-999	-999	-999	-999	-999	-999	-999	-999	-999	-999	-999	-999	-999
P	C	H	1	R1	13	0	0	0	0	0	0	0	0	0	1	0	0	0	0	0	0	0	0	0	0	0	1	0	0	0	0	1	0	0	0	0	1	1	8	0	0	0	0	0	0	0
P	C	H	1	R2	6	0	0	0	0	0	0	0	0	2	0	0	0	0	2	0	0	0	0	0	0	0	0	0	0	0	0	0	0	0	0	0	1	0	1	0	0	0	0	0	0	0
P	C	H	1	R3	1	0	0	0	0	0	0	0	0	0	0	0	0	0	0	0	0	0	0	0	0	0	0	0	0	0	0	0	0	0	0	0	0	0	1	0	0	0	0	0	0	0
P	C	H	1	R4	6	0	0	0	0	0	0	0	0	0	0	0	0	0	0	0	3	0	0	0	0	1	0	0	1	0	0	0	0	0	0	0	0	0	1	0	0	0	0	0	0	0
P	C	H	2	R1	3	0	0	0	0	0	0	0	0	0	0	0	0	0	0	0	0	0	0	0	0	0	0	0	0	0	0	1	0	0	0	0	0	0	2	0	0	0	0	0	0	0
P	C	H	2	R2	1	0	0	0	0	0	0	0	0	0	0	0	0	0	0	0	0	0	0	0	1	0	0	0	0	0	0	0	0	0	0	0	0	0	0	0	0	0	0	0	0	0
P	C	H	2	R3	3	0	0	0	0	0	0	0	0	0	0	0	0	0	0	0	0	0	0	0	0	0	0	0	0	0	0	0	0	0	0	0	0	0	2	0	0	0	0	0	0	1
P	C	H	2	R4	0	0	0	0	0	0	0	0	0	0	0	0	0	0	0	0	0	0	0	0	0	0	0	0	0	0	0	0	0	0	0	0	0	0	0	0	0	0	0	0	0	0
P	C	H	3	R1	2	0	0	0	0	0	0	0	0	0	0	0	0	0	0	0	0	0	0	0	0	0	0	0	0	0	0	0	0	0	1	0	0	0	1	0	0	0	0	0	0	0
P	C	H	3	R2	3	0	0	0	0	0	0	0	0	0	0	0	0	1	0	0	0	0	0	0	0	0	0	0	0	0	0	1	0	0	1	0	0	0	0	0	0	0	0	0	0	0
P	C	H	3	R3	2	0	0	0	0	0	0	0	0	0	0	0	0	0	0	0	0	0	0	0	0	0	0	0	0	0	0	0	0	0	0	0	0	0	1	0	1	0	0	0	0	0
P	C	H	3	R4	1	0	0	0	0	0	0	0	0	0	0	0	0	0	0	0	0	0	0	0	0	0	0	0	0	1	0	0	0	0	0	0	0	0	0	0	0	0	0	0	0	0
P	D	CN	1	R1	-999	-999	-999	-999	-999	-999	-999	-999	-999	-999	-999	-999	-999	-999	-999	-999	-999	-999	-999	-999	-999	-999	-999	-999	-999	-999	-999	-999	-999	-999	-999	-999	-999	-999	-999	-999	-999	-999	-999	-999	-999	-999
P	D	CN	1	R2	18	0	0	0	0	0	0	0	0	0	0	0	0	4	7	0	6	0	0	0	0	0	0	0	0	0	0	1	0	0	0	0	0	0	0	0	0	0	0	0	0	0
P	D	CN	1	R3	11	0	0	0	0	0	0	0	0	0	0	0	0	5	0	2	1	0	0	0	1	0	0	0	0	0	0	0	0	0	0	0	0	0	0	0	2	0	0	0	0	0
P	D	CN	1	R4	7	0	0	0	1	0	0	0	0	0	0	0	0	0	0	0	2	0	0	0	0	0	0	0	0	0	0	0	3	0	0	0	0	0	0	0	0	0	0	0	0	1
P	D	CN	2	R1	-999	-999	-999	-999	-999	-999	-999	-999	-999	-999	-999	-999	-999	-999	-999	-999	-999	-999	-999	-999	-999	-999	-999	-999	-999	-999	-999	-999	-999	-999	-999	-999	-999	-999	-999	-999	-999	-999	-999	-999	-999	-999
P	D	CN	2	R2	8	0	0	0	0	0	0	0	0	0	0	0	0	2	3	0	2	0	0	0	0	0	0	0	0	0	0	0	0	0	0	0	0	0	0	0	1	0	0	0	0	0
P	D	CN	2	R3	7	1	0	0	0	0	0	0	0	0	0	0	0	2	0	0	2	0	0	0	0	0	0	0	0	0	0	0	0	0	0	0	0	0	0	0	2	0	0	0	0	0
P	D	CN	2	R4	10	0	0	0	0	0	0	0	0	0	0	0	0	0	0	0	5	0	1	0	0	0	0	0	0	0	0	0	0	0	0	0	0	0	1	0	0	0	0	0	0	3
P	D	CN	3	R1	-999	-999	-999	-999	-999	-999	-999	-999	-999	-999	-999	-999	-999	-999	-999	-999	-999	-999	-999	-999	-999	-999	-999	-999	-999	-999	-999	-999	-999	-999	-999	-999	-999	-999	-999	-999	-999	-999	-999	-999	-999	-999
P	D	CN	3	R2	5	0	0	0	0	0	0	0	0	0	0	0	0	0	1	0	2	0	0	0	0	0	0	0	0	0	0	1	0	0	0	0	0	0	0	0	1	0	0	0	0	0
P	D	CN	3	R3	6	0	0	0	0	0	0	0	0	0	0	0	0	2	0	0	2	0	0	0	0	0	0	0	0	0	0	0	0	0	0	0	0	0	0	0	2	0	0	0	0	0
P	D	CN	3	R4	8	0	0	0	0	0	0	0	0	0	0	0	0	0	0	0	7	0	0	0	0	0	0	0	0	0	0	1	0	0	0	0	0	0	0	0	0	0	0	0	0	0
P	D	CRL2	1	R1	-999	-999	-999	-999	-999	-999	-999	-999	-999	-999	-999	-999	-999	-999	-999	-999	-999	-999	-999	-999	-999	-999	-999	-999	-999	-999	-999	-999	-999	-999	-999	-999	-999	-999	-999	-999	-999	-999	-999	-999	-999	-999
P	D	CRL2	1	R2	34	1	0	0	0	0	0	0	0	14	0	0	0	4	5	0	3	0	0	0	0	0	0	0	0	0	6	1	0	0	0	0	0	0	0	0	0	0	0	0	0	0
P	D	CRL2	1	R3	41	1	0	0	0	0	0	0	0	5	0	0	0	7	7	0	6	0	0	0	0	0	0	0	0	0	11	0	1	0	0	0	0	0	0	0	3	0	0	0	0	0
P	D	CRL2	1	R4	21	0	0	0	0	0	0	0	0	0	0	0	0	0	0	5	6	0	0	0	0	0	0	0	0	0	0	0	4	0	0	0	1	0	0	0	1	0	0	0	0	4
P	D	CRL2	2	R1	-999	-999	-999	-999	-999	-999	-999	-999	-999	-999	-999	-999	-999	-999	-999	-999	-999	-999	-999	-999	-999	-999	-999	-999	-999	-999	-999	-999	-999	-999	-999	-999	-999	-999	-999	-999	-999	-999	-999	-999	-999	-999
P	D	CRL2	2	R2	9	0	0	0	0	0	0	0	0	4	0	0	0	0	0	0	1	0	0	0	0	0	0	0	0	0	2	0	0	0	0	0	0	0	0	0	2	0	0	0	0	0
P	D	CRL2	2	R3	12	0	0	0	0	0	0	0	0	2	0	0	0	0	0	0	5	0	0	0	0	0	0	0	0	0	3	0	0	0	0	0	0	0	0	0	2	0	0	0	0	0
P	D	CRL2	2	R4	18	0	0	0	0	0	0	0	0	0	0	0	0	1	0	1	10	0	0	0	0	0	0	0	0	0	0	0	2	0	0	0	1	0	0	0	3	0	0	0	0	0
P	D	CRL2	3	R1	-999	-999	-999	-999	-999	-999	-999	-999	-999	-999	-999	-999	-999	-999	-999	-999	-999	-999	-999	-999	-999	-999	-999	-999	-999	-999	-999	-999	-999	-999	-999	-999	-999	-999	-999	-999	-999	-999	-999	-999	-999	-999
P	D	CRL2	3	R2	11	0	0	0	0	0	0	0	0	3	0	0	0	0	1	0	5	0	0	0	0	0	0	0	0	0	0	0	0	0	0	0	0	0	0	0	2	0	0	0	0	0
P	D	CRL2	3	R3	13	0	0	0	0	0	0	0	0	2	0	0	0	2	0	0	4	0	0	0	0	0	0	0	0	0	0	0	0	0	0	0	0	0	1	0	4	0	0	0	0	0
P	D	CRL2	3	R4	22	0	0	0	0	0	0	0	0	0	0	0	0	0	0	0	11	0	0	0	0	0	0	0	0	0	0	0	6	0	0	0	0	0	0	0	2	0	0	0	0	3
P	D	CRL30	1	R1	-999	-999	-999	-999	-999	-999	-999	-999	-999	-999	-999	-999	-999	-999	-999	-999	-999	-999	-999	-999	-999	-999	-999	-999	-999	-999	-999	-999	-999	-999	-999	-999	-999	-999	-999	-999	-999	-999	-999	-999	-999	-999
P	D	CRL30	1	R2	16	0	0	0	0	0	0	0	0	5	0	0	0	1	4	0	1	0	0	0	0	0	0	0	0	0	4	0	0	0	0	0	0	0	0	0	1	0	0	0	0	0
P	D	CRL30	1	R3	16	0	0	0	0	0	0	0	0	0	0	0	0	0	4	0	0	0	0	0	0	0	0	0	0	0	2	0	0	0	0	0	0	0	0	0	10	0	0	0	0	0
P	D	CRL30	1	R4	12	0	0	0	0	0	0	0	0	0	0	0	0	0	1	1	1	0	0	0	0	0	0	0	0	0	0	1	3	0	0	0	0	0	0	0	1	0	0	0	0	4
P	D	CRL30	2	R1	-999	-999	-999	-999	-999	-999	-999	-999	-999	-999	-999	-999	-999	-999	-999	-999	-999	-999	-999	-999	-999	-999	-999	-999	-999	-999	-999	-999	-999	-999	-999	-999	-999	-999	-999	-999	-999	-999	-999	-999	-999	-999
P	D	CRL30	2	R2	12	0	0	0	0	0	0	0	0	4	0	0	0	0	2	0	1	0	0	0	0	0	0	0	0	0	1	0	0	0	0	0	0	0	0	0	4	0	0	0	0	0
P	D	CRL30	2	R3	13	0	0	0	0	0	0	0	0	0	0	0	0	4	0	0	0	0	0	0	0	0	0	0	0	0	2	0	0	0	0	0	0	0	0	0	6	1	0	0	0	0
P	D	CRL30	2	R4	35	0	0	0	0	0	0	0	0	0	0	0	0	0	4	10	6	0	0	0	0	0	0	0	0	0	0	0	6	0	0	0	1	0	0	0	1	0	0	0	0	7
P	D	CRL30	3	R1	-999	-999	-999	-999	-999	-999	-999	-999	-999	-999	-999	-999	-999	-999	-999	-999	-999	-999	-999	-999	-999	-999	-999	-999	-999	-999	-999	-999	-999	-999	-999	-999	-999	-999	-999	-999	-999	-999	-999	-999	-999	-999
P	D	CRL30	3	R2	18	0	0	0	0	0	0	0	0	7	0	0	0	0	1	0	2	0	0	0	0	0	0	0	0	0	4	2	0	0	0	0	0	0	0	0	2	0	0	0	0	0
P	D	CRL30	3	R3	28	0	0	0	0	0	0	0	0	3	0	0	0	3	4	0	0	0	0	0	0	0	0	0	0	0	2	0	0	0	0	0	1	0	0	0	14	1	0	0	0	0
P	D	CRL30	3	R4	14	0	0	0	0	0	0	0	0	0	0	0	0	0	0	3	4	0	0	0	0	0	0	0	0	0	0	1	3	0	0	0	0	0	0	0	1	0	0	0	0	2
P	D	G	1	R1	-999	-999	-999	-999	-999	-999	-999	-999	-999	-999	-999	-999	-999	-999	-999	-999	-999	-999	-999	-999	-999	-999	-999	-999	-999	-999	-999	-999	-999	-999	-999	-999	-999	-999	-999	-999	-999	-999	-999	-999	-999	-999
P	D	G	1	R2	2	0	0	0	0	0	0	0	0	0	0	0	0	0	1	0	0	0	0	0	0	0	0	0	0	0	0	0	0	0	0	0	0	0	0	0	0	0	1	0	0	0
P	D	G	1	R3	0	0	0	0	0	0	0	0	0	0	0	0	0	0	0	0	0	0	0	0	0	0	0	0	0	0	0	0	0	0	0	0	0	0	0	0	0	0	0	0	0	0
P	D	G	1	R4	3	0	0	0	0	0	0	0	0	0	0	0	0	1	0	0	2	0	0	0	0	0	0	0	0	0	0	0	0	0	0	0	0	0	0	0	0	0	0	0	0	0
P	D	G	2	R1	-999	-999	-999	-999	-999	-999	-999	-999	-999	-999	-999	-999	-999	-999	-999	-999	-999	-999	-999	-999	-999	-999	-999	-999	-999	-999	-999	-999	-999	-999	-999	-999	-999	-999	-999	-999	-999	-999	-999	-999	-999	-999
P	D	G	2	R2	1	0	0	0	0	0	0	0	0	0	0	0	0	0	1	0	0	0	0	0	0	0	0	0	0	0	0	0	0	0	0	0	0	0	0	0	0	0	0	0	0	0
P	D	G	2	R3	4	0	0	0	0	0	0	1	0	0	0	0	0	0	0	0	0	0	0	0	0	0	0	0	0	0	2	0	0	0	0	0	0	0	0	0	0	1	0	0	0	0
P	D	G	2	R4	4	0	0	0	0	0	0	0	0	2	0	0	0	0	2	0	0	0	0	0	0	0	0	0	0	0	0	0	0	0	0	0	0	0	0	0	0	0	0	0	0	0
P	D	G	3	R1	-999	-999	-999	-999	-999	-999	-999	-999	-999	-999	-999	-999	-999	-999	-999	-999	-999	-999	-999	-999	-999	-999	-999	-999	-999	-999	-999	-999	-999	-999	-999	-999	-999	-999	-999	-999	-999	-999	-999	-999	-999	-999
P	D	G	3	R2	0	0	0	0	0	0	0	0	0	0	0	0	0	0	0	0	0	0	0	0	0	0	0	0	0	0	0	0	0	0	0	0	0	0	0	0	0	0	0	0	0	0
P	D	G	3	R3	1	0	0	0	0	0	0	0	0	0	0	0	0	0	0	0	0	0	0	0	0	0	0	0	0	0	0	0	0	0	0	0	0	0	0	0	0	1	0	0	0	0
P	D	G	3	R4	1	0	0	0	0	0	0	0	0	0	0	0	0	1	0	0	0	0	0	0	0	0	0	0	0	0	0	0	0	0	0	0	0	0	0	0	0	0	0	0	0	0
T	A	CRL2	1	R1	20	0	0	0	0	0	0	0	0	0	0	0	0	0	7	0	12	0	0	0	0	0	0	0	0	0	0	0	1	0	0	0	0	0	0	0	0	0	0	0	0	0
T	A	CRL2	1	R2	9	0	0	0	0	0	1	0	0	0	0	0	0	0	3	0	2	0	0	0	0	0	0	0	0	0	0	1	0	0	0	0	0	0	1	0	1	0	0	0	0	0
T	A	CRL2	1	R3	6	0	0	0	0	0	0	0	0	0	0	0	0	1	2	0	0	0	0	0	0	0	0	0	0	0	2	0	0	0	0	0	0	0	0	0	1	0	0	0	0	0
T	A	CRL2	1	R4	-999	-999	-999	-999	-999	-999	-999	-999	-999	-999	-999	-999	-999	-999	-999	-999	-999	-999	-999	-999	-999	-999	-999	-999	-999	-999	-999	-999	-999	-999	-999	-999	-999	-999	-999	-999	-999	-999	-999	-999	-999	-999
T	A	CRL2	2	R1	8	0	0	0	0	0	0	0	0	0	0	0	0	2	5	0	1	0	0	0	0	0	0	0	0	0	0	0	0	0	0	0	0	0	0	0	0	0	0	0	0	0
T	A	CRL2	2	R2	1	0	0	0	0	0	0	1	0	0	0	0	0	0	0	0	0	0	0	0	0	0	0	0	0	0	0	0	0	0	0	0	0	0	0	0	0	0	0	0	0	0
T	A	CRL2	2	R3	10	0	0	0	0	0	0	0	0	0	0	0	0	2	1	5	0	0	0	0	0	0	0	0	0	0	1	0	0	0	0	0	0	0	0	0	0	1	0	0	0	0
T	A	CRL2	2	R4	-999	-999	-999	-999	-999	-999	-999	-999	-999	-999	-999	-999	-999	-999	-999	-999	-999	-999	-999	-999	-999	-999	-999	-999	-999	-999	-999	-999	-999	-999	-999	-999	-999	-999	-999	-999	-999	-999	-999	-999	-999	-999
T	A	CRL2	3	R1	13	0	0	0	0	1	0	0	0	0	0	0	0	0	4	1	3	0	0	0	0	0	0	0	0	0	0	0	1	0	2	0	0	0	0	0	1	0	0	0	0	0
T	A	CRL2	3	R2	0	0	0	0	0	0	0	0	0	0	0	0	0	0	0	0	0	0	0	0	0	0	0	0	0	0	0	0	0	0	0	0	0	0	0	0	0	0	0	0	0	0
T	A	CRL2	3	R3	9	0	0	0	0	0	0	0	0	0	0	0	0	0	1	0	1	0	0	0	0	0	0	0	0	0	1	0	0	1	0	0	0	0	3	0	0	2	0	0	0	0
T	A	CRL2	3	R4	-999	-999	-999	-999	-999	-999	-999	-999	-999	-999	-999	-999	-999	-999	-999	-999	-999	-999	-999	-999	-999	-999	-999	-999	-999	-999	-999	-999	-999	-999	-999	-999	-999	-999	-999	-999	-999	-999	-999	-999	-999	-999
T	A	CRL30	1	R1	19	0	0	0	0	0	0	0	0	0	0	0	0	3	7	1	5	0	0	0	0	0	0	0	0	0	0	0	0	1	1	0	0	0	0	0	1	0	0	0	0	0
T	A	CRL30	1	R2	21	0	0	0	0	0	2	0	0	9	0	1	0	0	1	0	5	0	0	0	0	0	0	0	0	0	1	1	0	0	0	0	0	0	0	0	1	0	0	0	0	0
T	A	CRL30	1	R3	5	0	0	0	0	0	0	1	0	0	0	0	0	0	0	0	1	0	0	0	0	0	0	0	0	0	1	0	0	0	0	0	0	0	1	0	0	1	0	0	0	0
T	A	CRL30	1	R4	-999	-999	-999	-999	-999	-999	-999	-999	-999	-999	-999	-999	-999	-999	-999	-999	-999	-999	-999	-999	-999	-999	-999	-999	-999	-999	-999	-999	-999	-999	-999	-999	-999	-999	-999	-999	-999	-999	-999	-999	-999	-999
T	A	CRL30	2	R1	8	0	0	0	0	0	0	0	0	0	0	0	0	0	6	0	0	0	0	0	0	0	0	0	0	0	0	0	0	0	1	0	1	0	0	0	0	0	0	0	0	0
T	A	CRL30	2	R2	2	0	0	0	0	0	0	0	0	1	0	0	0	0	0	0	0	0	0	0	0	0	0	0	0	0	0	0	0	0	0	0	0	0	0	0	1	0	0	0	0	0
T	A	CRL30	2	R3	13	1	0	0	0	0	0	0	0	3	0	0	0	1	0	0	2	0	0	0	0	0	0	0	0	0	4	0	0	0	0	0	1	0	0	0	1	0	0	0	0	0
T	A	CRL30	2	R4	-999	-999	-999	-999	-999	-999	-999	-999	-999	-999	-999	-999	-999	-999	-999	-999	-999	-999	-999	-999	-999	-999	-999	-999	-999	-999	-999	-999	-999	-999	-999	-999	-999	-999	-999	-999	-999	-999	-999	-999	-999	-999
T	A	CRL30	3	R1	5	0	0	0	0	0	0	0	0	1	0	0	0	1	2	0	0	0	0	0	0	0	0	0	0	0	0	0	0	0	1	0	0	0	0	0	0	0	0	0	0	0
T	A	CRL30	3	R2	1	0	0	0	0	0	0	0	0	0	0	0	0	0	0	0	0	0	0	0	0	0	0	0	0	0	0	0	0	0	0	0	0	0	0	0	1	0	0	0	0	0
T	A	CRL30	3	R3	10	0	0	0	0	0	0	1	0	2	0	0	0	0	1	0	0	0	0	0	1	0	0	0	0	0	1	0	0	0	0	0	0	0	0	0	3	0	0	0	0	1
T	A	CRL30	3	R4	-999	-999	-999	-999	-999	-999	-999	-999	-999	-999	-999	-999	-999	-999	-999	-999	-999	-999	-999	-999	-999	-999	-999	-999	-999	-999	-999	-999	-999	-999	-999	-999	-999	-999	-999	-999	-999	-999	-999	-999	-999	-999
T	A	H	1	R1	3	0	0	0	0	0	0	0	0	0	0	0	0	0	0	0	0	0	0	0	0	0	0	0	0	0	0	1	2	0	0	0	0	0	0	0	0	0	0	0	0	0
T	A	H	1	R2	1	0	0	0	0	0	0	0	0	0	0	0	0	0	0	0	0	0	0	0	0	0	0	0	0	0	0	1	0	0	0	0	0	0	0	0	0	0	0	0	0	0
T	A	H	1	R3	0	0	0	0	0	0	0	0	0	0	0	0	0	0	0	0	0	0	0	0	0	0	0	0	0	0	0	0	0	0	0	0	0	0	0	0	0	0	0	0	0	0
T	A	H	1	R4	0	0	0	0	0	0	0	0	0	0	0	0	0	0	0	0	0	0	0	0	0	0	0	0	0	0	0	0	0	0	0	0	0	0	0	0	0	0	0	0	0	0
T	A	H	2	R1	3	0	0	0	0	0	0	0	0	0	0	0	0	0	0	0	0	0	0	0	0	0	0	0	0	0	0	0	3	0	0	0	0	0	0	0	0	0	0	0	0	0
T	A	H	2	R2	1	0	0	0	0	0	0	0	0	0	0	0	0	0	0	0	0	0	0	0	0	0	0	0	0	0	0	1	0	0	0	0	0	0	0	0	0	0	0	0	0	0
T	A	H	2	R3	1	0	0	0	0	0	0	0	0	0	0	0	0	0	0	0	0	0	0	0	0	0	0	0	0	0	0	0	0	0	0	0	0	0	0	0	1	0	0	0	0	0
T	A	H	2	R4	2	0	0	0	0	0	0	0	0	0	0	0	0	0	0	0	0	0	0	0	0	0	0	0	0	0	0	1	1	0	0	0	0	0	0	0	0	0	0	0	0	0
T	A	H	3	R1	1	0	0	0	0	0	0	0	0	0	0	0	0	0	0	0	0	0	0	0	0	0	0	0	0	1	0	0	0	0	0	0	0	0	0	0	0	0	0	0	0	0
T	A	H	3	R2	0	0	0	0	0	0	0	0	0	0	0	0	0	0	0	0	0	0	0	0	0	0	0	0	0	0	0	0	0	0	0	0	0	0	0	0	0	0	0	0	0	0
T	A	H	3	R3	0	0	0	0	0	0	0	0	0	0	0	0	0	0	0	0	0	0	0	0	0	0	0	0	0	0	0	0	0	0	0	0	0	0	0	0	0	0	0	0	0	0
T	A	H	3	R4	0	0	0	0	0	0	0	0	0	0	0	0	0	0	0	0	0	0	0	0	0	0	0	0	0	0	0	0	0	0	0	0	0	0	0	0	0	0	0	0	0	0
T	B	CRL2	1	R1	28	0	0	0	0	0	0	0	0	2	1	2	0	0	6	0	15	0	0	0	0	0	0	0	0	0	0	0	1	0	0	0	1	0	0	0	0	0	0	0	0	0
T	B	CRL2	1	R2	29	0	0	0	0	0	0	0	0	10	0	0	0	1	3	0	0	0	0	0	0	0	0	0	0	0	4	2	0	0	0	0	0	0	0	0	7	0	0	2	0	0
T	B	CRL2	1	R3	11	0	0	0	0	0	0	0	0	0	0	0	0	0	1	0	4	0	0	0	0	0	0	0	0	0	0	0	0	0	0	0	0	0	1	0	4	0	0	1	0	0
T	B	CRL2	1	R4	12	0	0	0	0	0	0	0	0	0	0	0	0	0	0	0	3	0	0	0	0	0	0	0	0	0	0	3	4	0	0	0	0	0	0	0	2	0	0	0	0	0
T	B	CRL2	2	R1	37	1	0	0	0	0	0	1	0	4	0	0	0	2	6	0	19	0	0	0	0	0	0	0	0	0	1	0	1	1	0	0	0	0	0	0	1	0	0	0	0	0
T	B	CRL2	2	R2	27	1	0	0	0	0	0	0	0	6	0	1	0	0	4	0	3	0	0	0	0	0	0	0	0	0	2	4	0	0	0	0	0	0	0	0	6	0	0	0	0	0
T	B	CRL2	2	R3	44	2	0	0	0	0	0	0	0	0	0	0	0	5	2	1	25	0	0	0	0	0	0	0	0	0	2	0	0	1	0	0	0	0	0	0	6	0	0	0	0	0
T	B	CRL2	2	R4	7	0	0	0	0	0	0	0	0	0	0	0	0	1	0	0	2	0	0	0	0	0	0	0	0	0	0	2	1	0	0	0	1	0	0	0	0	0	0	0	0	0
T	B	CRL2	3	R1	26	0	0	0	0	0	0	0	0	0	0	2	0	0	3	0	13	0	0	0	0	0	0	0	0	0	0	2	4	1	1	0	0	0	0	0	0	0	0	0	0	0
T	B	CRL2	3	R2	21	1	0	0	0	0	0	0	0	1	0	0	0	0	5	0	3	0	0	0	0	0	0	0	0	0	0	3	0	0	0	0	0	0	0	0	6	1	0	1	0	0
T	B	CRL2	3	R3	20	0	0	0	0	0	0	0	0	1	0	0	0	2	1	0	12	0	0	0	0	0	0	0	0	0	0	0	0	0	0	0	0	0	0	0	4	0	0	0	0	0
T	B	CRL2	3	R4	10	0	0	0	0	0	0	0	0	0	0	0	0	1	0	0	5	0	0	0	0	0	0	0	0	0	0	1	2	0	0	0	0	0	0	0	1	0	0	0	0	0
T	B	CRL30	1	R1	36	0	0	0	0	0	0	0	0	4	0	1	0	2	8	0	14	0	0	0	0	0	0	0	0	0	4	1	2	0	0	0	0	0	0	0	0	0	0	0	0	0
T	B	CRL30	1	R2	8	1	0	0	0	0	0	0	0	4	0	0	0	0	0	0	2	0	0	0	0	0	0	0	0	0	0	0	0	0	0	0	0	0	0	0	1	0	0	0	0	0
T	B	CRL30	1	R3	32	0	0	0	0	0	0	0	0	3	0	0	0	3	4	1	2	0	0	0	0	0	0	0	0	0	5	0	0	0	0	0	0	0	0	0	14	0	0	0	0	0
T	B	CRL30	1	R4	16	0	0	0	0	0	0	0	0	0	0	0	0	1	1	1	1	0	0	0	0	0	0	0	0	0	0	1	2	0	0	0	1	0	0	0	4	1	0	0	0	3
T	B	CRL30	2	R1	14	0	0	0	0	0	0	0	0	2	0	2	0	0	1	0	4	0	0	0	0	0	0	0	0	0	1	1	1	0	1	0	1	0	0	0	0	0	0	0	0	0
T	B	CRL30	2	R2	28	1	0	0	0	0	0	0	0	12	0	0	0	0	0	0	5	0	0	0	0	0	0	0	0	0	0	0	0	0	0	0	0	0	0	0	9	0	0	1	0	0
T	B	CRL30	2	R3	7	0	0	0	0	0	0	0	0	1	0	1	0	0	0	0	0	0	0	0	0	0	0	0	0	0	3	0	0	0	0	0	0	0	1	0	1	0	0	0	0	0
T	B	CRL30	2	R4	8	0	0	0	0	0	0	0	0	0	0	0	0	0	0	0	0	0	0	0	0	0	0	0	0	0	0	0	4	0	0	0	0	0	0	0	3	0	0	0	0	1
T	B	CRL30	3	R1	25	0	0	0	0	0	0	0	0	4	0	0	0	0	3	0	1	0	0	0	1	0	0	0	0	0	1	3	9	1	1	0	1	0	0	0	0	0	0	0	0	0
T	B	CRL30	3	R2	21	0	0	0	0	0	0	0	0	4	0	0	0	2	2	0	4	0	0	0	0	0	0	0	0	0	1	0	0	0	0	0	0	0	0	0	8	0	0	0	0	0
T	B	CRL30	3	R3	25	0	0	0	0	0	0	0	0	0	0	0	0	4	6	0	6	0	0	0	0	0	0	0	0	0	2	0	0	0	1	0	0	0	0	0	4	0	0	1	0	1
T	B	CRL30	3	R4	21	0	0	0	0	0	0	0	0	0	0	0	0	0	0	0	1	0	0	0	0	0	0	0	0	0	0	5	10	1	0	0	0	0	0	0	3	0	0	0	0	1
T	B	G	1	R1	13	0	0	0	0	0	0	0	0	0	0	0	1	0	3	0	3	0	0	0	0	0	0	0	0	0	1	0	3	0	0	0	0	0	0	0	0	0	1	0	0	1
T	B	G	1	R2	22	0	0	0	0	0	0	0	0	1	0	0	0	3	9	0	1	0	0	0	0	0	0	0	0	0	2	4	0	0	0	0	0	0	0	0	2	0	0	0	0	0
T	B	G	1	R3	9	0	0	0	0	1	0	0	0	0	0	0	0	0	2	0	2	0	0	0	0	0	0	0	0	0	3	0	0	0	0	0	0	0	0	0	1	0	0	0	0	0
T	B	G	1	R4	14	0	0	0	0	0	0	0	0	0	0	0	0	3	0	0	10	0	0	0	0	0	0	0	0	0	0	0	0	0	0	0	0	0	0	0	0	0	0	1	0	0
T	B	G	2	R1	1	0	0	0	0	0	0	0	0	0	0	0	0	0	1	0	0	0	0	0	0	0	0	0	0	0	0	0	0	0	0	0	0	0	0	0	0	0	0	0	0	0
T	B	G	2	R2	10	1	0	0	0	0	0	0	0	1	0	0	0	0	0	0	1	0	0	0	0	0	0	0	0	0	0	4	0	0	0	0	1	0	0	0	2	0	0	0	0	0
T	B	G	2	R3	3	0	0	0	0	0	0	0	0	0	0	0	0	0	0	0	1	0	0	0	0	0	0	0	0	0	0	1	0	0	0	0	0	0	0	0	1	0	0	0	0	0
T	B	G	2	R4	29	0	0	0	0	0	0	0	0	0	0	0	0	3	0	0	23	0	0	0	0	0	0	0	0	0	0	0	0	0	0	0	0	0	0	0	0	0	1	0	0	2
T	B	G	3	R1	20	0	0	0	0	0	0	0	0	2	0	0	0	2	5	0	7	0	0	0	0	0	0	0	0	0	0	2	2	0	0	0	0	0	0	0	0	0	0	0	0	0
T	B	G	3	R2	16	0	0	0	0	0	0	0	0	3	0	0	0	0	6	0	4	0	0	0	0	0	0	0	0	0	0	1	0	0	0	0	0	0	0	0	1	1	0	0	0	0
T	B	G	3	R3	12	0	0	0	0	0	0	0	0	0	0	0	0	0	0	0	2	0	0	0	0	0	0	0	0	1	0	3	0	0	1	0	0	0	0	0	5	0	0	0	0	0
T	B	G	3	R4	12	0	0	0	0	0	0	0	0	0	0	0	0	3	0	0	8	0	0	0	0	0	0	0	0	0	0	0	0	0	0	0	0	0	0	0	0	0	0	0	0	1
T	C	CN	1	R1	20	0	0	0	0	1	0	1	0	0	0	0	0	0	0	0	2	0	0	0	0	2	0	0	0	0	0	3	4	0	0	0	4	0	2	0	0	0	0	1	0	0
T	C	CN	1	R2	12	4	0	0	0	0	3	0	0	1	0	0	0	0	0	0	0	0	0	0	0	1	0	0	0	0	0	0	0	0	0	0	1	0	0	0	2	0	0	0	0	0
T	C	CN	1	R3	14	2	1	0	0	0	0	1	0	0	1	0	0	0	4	0	0	0	0	0	0	0	0	0	0	0	3	0	0	0	0	0	1	0	0	0	1	0	0	0	0	0
T	C	CN	1	R4	10	0	0	0	0	0	0	0	0	0	0	0	0	1	0	0	0	0	0	0	0	0	0	0	0	0	0	4	2	0	0	0	1	0	0	0	0	2	0	0	0	0
T	C	CN	2	R1	24	2	0	0	0	1	0	1	0	1	0	0	0	0	3	0	2	0	0	0	1	0	0	0	0	0	0	3	3	0	0	0	5	0	2	0	0	0	0	0	0	0
T	C	CN	2	R2	5	0	0	0	0	0	2	0	0	0	0	0	0	0	0	0	0	0	0	0	0	0	0	0	0	0	0	1	0	0	0	0	0	0	1	0	1	0	0	0	0	0
T	C	CN	2	R3	18	0	0	0	1	0	0	2	0	0	2	0	0	1	2	0	0	0	0	0	0	4	0	0	0	0	2	0	0	0	0	0	1	0	1	0	1	0	0	1	0	0
T	C	CN	2	R4	5	0	0	0	0	0	0	0	0	0	0	0	0	0	0	0	1	0	0	0	0	0	0	0	0	0	0	3	0	0	0	0	1	0	0	0	0	0	0	0	0	0
T	C	CN	3	R1	11	0	0	0	0	0	0	0	0	0	0	0	0	0	2	0	0	0	0	0	1	0	0	0	0	0	0	2	2	0	0	0	2	0	2	0	0	0	0	0	0	0
T	C	CN	3	R2	7	0	0	0	0	1	0	0	0	6	0	0	0	0	0	0	0	0	0	0	0	0	0	0	0	0	0	0	0	0	0	0	0	0	0	0	0	0	0	0	0	0
T	C	CN	3	R3	18	1	0	0	3	2	0	0	0	0	0	1	0	0	6	1	0	0	0	0	0	0	0	0	0	0	1	0	0	0	0	0	1	0	1	0	1	0	0	0	0	0
T	C	CN	3	R4	16	0	0	0	0	0	0	0	0	0	0	0	0	0	0	5	2	0	0	0	0	0	0	0	0	0	0	8	0	0	0	0	0	0	0	0	1	0	0	0	0	0
T	C	CRL2	1	R1	15	0	0	0	0	0	0	0	0	4	0	1	0	0	2	0	0	0	0	0	1	0	0	0	0	0	0	0	6	0	0	0	0	1	0	0	0	0	0	0	0	0
T	C	CRL2	1	R2	6	1	0	0	0	0	0	0	0	1	0	0	0	0	1	0	0	0	0	0	0	0	0	0	0	0	0	0	0	0	0	0	0	0	0	0	3	0	0	0	0	0
T	C	CRL2	1	R3	19	0	0	0	0	0	0	0	0	5	0	0	0	1	0	0	4	0	0	0	0	0	0	0	0	0	4	0	0	0	1	0	0	0	2	0	1	0	0	0	0	1
T	C	CRL2	1	R4	11	0	0	0	0	0	0	0	0	0	0	0	0	0	0	0	0	0	0	0	0	0	0	0	0	0	0	5	5	0	0	0	0	0	0	0	0	1	0	0	0	0
T	C	CRL2	2	R1	26	0	0	0	0	0	0	1	0	11	0	1	0	0	2	0	4	0	0	0	0	0	0	0	0	0	4	1	1	0	0	0	1	0	0	0	0	0	0	0	0	0
T	C	CRL2	2	R2	12	0	0	0	0	0	0	1	0	4	0	0	0	0	1	0	0	0	0	0	0	0	0	0	0	0	1	2	0	0	0	0	0	0	0	0	3	0	0	0	0	0
T	C	CRL2	2	R3	12	0	0	0	0	0	0	0	0	0	0	0	0	2	2	0	3	0	0	0	0	1	0	0	0	0	4	0	0	0	0	0	0	0	0	0	0	0	0	0	0	0
T	C	CRL2	2	R4	10	0	0	0	0	0	0	0	0	0	0	0	0	0	0	0	0	0	0	0	0	0	0	0	0	0	0	4	5	0	0	0	1	0	0	0	0	0	0	0	0	0
T	C	CRL2	3	R1	9	0	0	0	0	0	0	0	0	8	0	0	0	0	0	0	0	0	0	0	0	0	0	0	0	0	0	0	1	0	0	0	0	0	0	0	0	0	0	0	0	0
T	C	CRL2	3	R2	19	1	0	0	0	0	0	0	0	13	0	0	0	1	0	0	0	0	0	0	0	0	0	0	0	0	0	2	0	0	0	0	0	0	0	0	2	0	0	0	0	0
T	C	CRL2	3	R3	13	0	0	0	0	0	0	2	0	0	0	0	0	1	2	2	1	0	0	0	0	0	0	0	0	0	2	1	0	0	0	0	0	0	0	0	2	0	0	0	0	0
T	C	CRL2	3	R4	21	0	0	0	0	0	0	0	0	0	0	0	0	1	0	0	1	0	0	0	0	0	0	0	0	0	0	7	10	0	0	0	0	0	0	0	0	0	0	0	0	2
T	C	CRL30	1	R1	20	0	0	0	0	0	0	0	0	3	0	0	0	0	5	0	2	0	0	0	0	1	0	0	0	0	1	1	4	2	0	0	0	0	0	0	1	0	0	0	0	0
T	C	CRL30	1	R2	29	0	0	0	0	0	0	0	0	7	0	0	0	1	2	0	0	0	0	0	0	0	0	0	0	0	4	6	0	0	0	0	0	0	0	0	9	0	0	0	0	0
T	C	CRL30	1	R3	14	0	0	0	0	0	0	0	0	0	0	0	0	1	0	0	1	0	0	0	0	0	0	0	0	0	1	0	0	0	0	0	0	0	0	0	10	0	0	1	0	0
T	C	CRL30	1	R4	13	0	0	0	0	0	0	0	0	0	0	0	0	0	0	0	0	0	0	0	0	0	0	0	0	0	0	3	10	0	0	0	0	0	0	0	0	0	0	0	0	0
T	C	CRL30	2	R1	15	0	0	0	0	0	0	0	0	3	0	0	0	0	0	0	2	0	0	0	0	0	0	0	0	0	1	4	3	0	1	0	0	0	0	0	1	0	0	0	0	0
T	C	CRL30	2	R2	17	0	0	0	0	0	0	0	0	5	0	0	0	1	1	0	3	0	0	0	0	0	0	0	0	0	0	3	0	0	0	0	0	0	0	0	4	0	0	0	0	0
T	C	CRL30	2	R3	23	1	0	0	0	0	0	0	0	1	0	0	0	3	2	0	0	0	0	0	0	0	0	0	0	0	4	1	0	0	0	0	0	0	0	0	11	0	0	0	0	0
T	C	CRL30	2	R4	15	0	0	0	0	0	0	0	0	0	0	0	0	0	0	0	0	0	0	0	0	0	0	0	0	0	0	6	4	0	0	0	0	0	0	0	2	0	0	1	0	2
T	C	CRL30	3	R1	17	0	0	0	0	0	0	0	0	1	0	0	0	0	2	0	2	0	0	0	0	0	0	0	0	0	0	3	9	0	0	0	0	0	0	0	0	0	0	0	0	0
T	C	CRL30	3	R2	7	0	0	0	0	0	0	0	0	1	0	0	0	0	0	0	1	0	0	0	0	0	0	0	0	0	0	1	0	0	0	0	1	0	0	0	2	0	0	1	0	0
T	C	CRL30	3	R3	1	0	0	0	0	0	0	0	0	0	0	0	0	0	0	0	0	0	0	0	0	0	0	0	0	0	0	0	0	0	0	0	0	0	0	0	1	0	0	0	0	0
T	C	CRL30	3	R4	13	0	0	0	0	0	0	0	0	0	0	0	0	0	1	0	0	0	0	0	0	0	0	0	0	0	0	4	3	0	0	0	0	0	0	0	1	1	0	0	0	3
T	C	H	1	R1	16	0	0	0	0	0	0	0	0	0	0	0	0	0	0	0	0	0	0	0	0	0	0	0	0	0	0	5	11	0	0	0	0	0	0	0	0	0	0	0	0	0
T	C	H	1	R2	0	0	0	0	0	0	0	0	0	0	0	0	0	0	0	0	0	0	0	0	0	0	0	0	0	0	0	0	0	0	0	0	0	0	0	0	0	0	0	0	0	0
T	C	H	1	R3	9	0	0	0	0	0	0	0	0	0	0	0	0	0	0	0	0	0	0	0	0	0	0	0	0	0	2	0	0	0	0	0	0	0	1	0	0	0	0	0	0	6
T	C	H	1	R4	0	0	0	0	0	0	0	0	0	0	0	0	0	0	0	0	0	0	0	0	0	0	0	0	0	0	0	0	0	0	0	0	0	0	0	0	0	0	0	0	0	0
T	C	H	2	R1	6	0	0	0	0	0	0	0	0	0	0	0	0	0	1	0	0	0	0	0	0	0	0	0	0	0	0	1	3	0	0	0	0	0	1	0	0	0	0	0	0	0
T	C	H	2	R2	1	0	0	0	0	0	0	0	0	0	0	0	0	0	0	0	0	0	0	0	0	0	0	0	0	0	0	0	0	0	0	0	0	0	0	0	0	0	0	0	0	1
T	C	H	2	R3	3	0	0	0	0	0	0	0	0	0	0	0	1	0	0	0	0	0	0	0	0	0	0	0	0	0	1	0	0	0	0	0	0	0	0	0	0	0	0	0	0	1
T	C	H	2	R4	2	0	0	0	0	0	0	0	0	0	0	0	0	0	0	0	0	0	0	0	0	0	0	0	0	0	0	1	1	0	0	0	0	0	0	0	0	0	0	0	0	0
T	C	H	3	R1	10	0	0	0	0	0	0	0	0	0	0	0	0	0	2	0	0	0	0	0	0	0	0	0	0	0	0	3	4	0	0	0	0	0	0	0	0	0	0	0	0	1
T	C	H	3	R2	0	0	0	0	0	0	0	0	0	0	0	0	0	0	0	0	0	0	0	0	0	0	0	0	0	0	0	0	0	0	0	0	0	0	0	0	0	0	0	0	0	0
T	C	H	3	R3	4	0	0	0	0	0	0	0	0	0	0	0	0	0	1	0	0	0	0	0	0	0	0	0	0	0	1	0	0	0	0	0	0	0	0	0	0	0	0	0	0	2
T	C	H	3	R4	1	0	0	0	0	0	0	0	0	0	0	0	0	0	0	0	1	0	0	0	0	0	0	0	0	0	0	0	0	0	0	0	0	0	0	0	0	0	0	0	0	0
T	D	CN	1	R1	6	1	0	0	0	0	0	0	0	0	0	0	0	0	1	0	0	0	0	0	0	0	0	0	0	0	0	0	2	1	0	0	0	0	0	0	0	0	0	1	0	0
T	D	CN	1	R2	31	2	11	0	0	0	0	5	0	1	1	0	0	0	3	0	0	0	0	0	0	5	0	0	0	0	0	0	0	0	0	0	0	0	2	0	1	0	0	0	0	0
T	D	CN	1	R3	8	0	0	0	0	0	0	0	0	0	0	0	0	3	0	0	0	0	0	0	0	1	0	0	0	0	2	0	0	0	0	0	0	0	0	2	0	0	0	0	0	0
T	D	CN	1	R4	7	0	0	0	0	0	0	0	0	0	0	0	0	1	0	3	0	0	0	0	0	0	0	0	0	0	0	1	0	0	0	0	0	0	0	0	1	0	0	0	0	1
T	D	CN	2	R1	6	0	0	0	0	0	0	0	0	0	0	0	0	1	5	0	0	0	0	0	0	0	0	0	0	0	0	0	0	0	0	0	0	0	0	0	0	0	0	0	0	0
T	D	CN	2	R2	16	0	3	0	0	0	0	0	5	0	2	0	0	1	0	0	0	0	0	0	0	0	0	0	0	0	0	0	0	0	0	0	1	0	1	2	0	0	0	1	0	0
T	D	CN	2	R3	26	0	0	0	2	4	3	0	0	0	0	0	0	3	4	1	0	0	0	0	0	0	0	0	0	0	3	0	0	0	0	0	0	0	2	4	0	0	0	0	0	0
T	D	CN	2	R4	12	0	0	0	0	0	0	0	0	0	0	0	0	1	0	0	3	0	0	0	0	0	0	0	0	0	0	1	2	0	0	0	0	0	0	0	2	0	0	0	0	3
T	D	CN	3	R1	1	0	0	0	0	0	0	0	0	0	1	0	0	0	0	0	0	0	0	0	0	0	0	0	0	0	0	0	0	0	0	0	0	0	0	0	0	0	0	0	0	0
T	D	CN	3	R2	10	0	1	0	0	0	0	0	0	3	0	0	0	1	0	0	0	0	0	0	0	1	0	0	0	0	0	0	0	0	0	0	0	1	1	0	0	0	0	2	0	0
T	D	CN	3	R3	13	0	0	0	0	0	0	0	0	2	0	0	0	2	6	0	0	0	0	0	0	0	0	0	0	0	1	0	0	0	0	0	0	0	0	2	0	0	0	0	0	0
T	D	CN	3	R4	4	0	0	0	0	0	0	0	0	0	0	0	0	0	0	0	1	0	0	0	0	0	0	0	0	0	0	0	0	1	0	0	0	0	0	0	0	0	0	0	0	2
T	D	CRL2	1	R1	2	0	0	0	0	0	0	0	0	0	0	1	1	0	0	0	0	0	0	0	0	0	0	0	0	0	0	0	0	0	0	0	0	0	0	0	0	0	0	0	0	0
T	D	CRL2	1	R2	10	0	0	0	0	0	0	0	0	0	0	0	0	0	0	0	0	0	0	0	0	0	0	0	0	0	0	0	0	0	0	0	0	0	7	3	0	0	0	0	0	0
T	D	CRL2	1	R3	7	0	0	0	0	0	0	0	0	1	0	0	0	1	0	0	0	0	0	0	0	0	0	0	0	0	0	0	0	0	0	0	0	0	1	4	0	0	0	0	0	0
T	D	CRL2	1	R4	5	0	0	0	0	0	0	0	0	0	0	0	0	0	0	0	0	0	0	0	0	0	0	0	0	0	0	1	2	0	0	0	0	0	0	0	0	0	0	0	0	2
T	D	CRL2	2	R1	0	0	0	0	0	0	0	0	0	0	0	0	0	0	0	0	0	0	0	0	0	0	0	0	0	0	0	0	0	0	0	0	0	0	0	0	0	0	0	0	0	0
T	D	CRL2	2	R2	4	0	0	0	0	0	0	0	0	0	0	0	0	0	0	0	0	0	0	0	0	0	0	0	0	0	0	0	0	0	0	0	0	0	3	1	0	0	0	0	0	0
T	D	CRL2	2	R3	14	0	0	0	0	0	0	0	0	0	0	0	0	2	0	0	0	0	0	0	0	0	0	0	0	0	0	0	0	0	0	0	0	0	0	12	0	0	0	0	0	0
T	D	CRL2	2	R4	6	0	0	0	0	0	0	0	0	1	0	0	0	0	0	0	0	0	0	0	0	0	0	0	0	0	0	3	0	0	0	0	0	0	0	1	0	0	0	0	0	1
T	D	CRL2	3	R1	2	0	0	0	0	0	0	0	0	0	0	0	1	0	1	0	0	0	0	0	0	0	0	0	0	0	0	0	0	0	0	0	0	0	0	0	0	0	0	0	0	0
T	D	CRL2	3	R2	6	0	0	0	0	0	0	0	0	0	0	0	0	1	0	0	0	0	0	0	0	0	0	0	0	0	0	0	0	0	0	0	0	0	0	5	0	0	0	0	0	0
T	D	CRL2	3	R3	19	0	0	0	0	1	0	0	0	0	0	0	0	2	0	0	0	0	0	0	0	0	0	0	0	0	1	0	0	0	0	0	0	0	1	14	0	0	0	0	0	0
T	D	CRL2	3	R4	7	0	0	0	0	0	0	0	0	0	0	0	0	0	0	0	0	0	0	0	0	0	0	0	0	0	0	1	0	0	0	0	0	0	0	4	0	0	0	0	0	2
T	D	CRL30	1	R1	0	0	0	0	0	0	0	0	0	0	0	0	0	0	0	0	0	0	0	0	0	0	0	0	0	0	0	0	0	0	0	0	0	0	0	0	0	0	0	0	0	0
T	D	CRL30	1	R2	19	0	0	0	0	0	0	0	0	1	0	0	0	5	6	0	0	0	0	0	0	1	0	0	0	0	0	0	0	0	0	0	0	0	3	2	1	0	0	0	0	0
T	D	CRL30	1	R3	7	0	0	0	0	0	0	0	0	0	0	0	0	0	4	0	0	0	0	0	0	0	0	0	0	0	3	0	0	0	0	0	0	0	0	0	0	0	0	0	0	0
T	D	CRL30	1	R4	9	0	0	0	0	0	0	0	0	0	0	0	0	0	0	0	0	0	0	0	0	0	0	0	0	0	0	6	2	0	0	0	0	0	1	0	0	0	0	0	0	0
T	D	CRL30	2	R1	1	0	1	0	0	0	0	0	0	0	0	0	0	0	0	0	0	0	0	0	0	0	0	0	0	0	0	0	0	0	0	0	0	0	0	0	0	0	0	0	0	0
T	D	CRL30	2	R2	6	2	0	0	0	0	0	0	0	0	0	0	0	1	2	0	0	0	0	0	0	0	0	0	0	0	0	0	0	0	0	0	0	0	1	0	0	0	0	0	0	0
T	D	CRL30	2	R3	0	0	0	0	0	0	0	0	0	0	0	0	0	0	0	0	0	0	0	0	0	0	0	0	0	0	0	0	0	0	0	0	0	0	0	0	0	0	0	0	0	0
T	D	CRL30	2	R4	1	0	0	0	0	0	0	0	0	0	0	0	0	0	0	0	0	0	0	0	0	0	0	0	0	0	0	0	1	0	0	0	0	0	0	0	0	0	0	0	0	0
T	D	CRL30	3	R1	2	0	0	0	0	0	0	0	0	0	0	0	0	0	1	0	0	0	0	0	1	0	0	0	0	0	0	0	0	0	0	0	0	0	0	0	0	0	0	0	0	0
T	D	CRL30	3	R2	6	1	0	1	0	0	0	0	0	0	0	0	0	2	1	0	0	0	0	0	0	0	0	0	0	0	0	0	0	0	0	0	0	0	0	0	1	0	0	0	0	0
T	D	CRL30	3	R3	20	1	0	0	0	0	0	1	0	0	0	0	0	15	0	0	1	0	0	0	0	0	0	0	0	0	1	0	0	0	0	0	0	0	0	1	0	0	0	0	0	0
T	D	CRL30	3	R4	3	0	0	0	0	0	0	0	0	0	0	0	0	0	0	0	0	0	0	0	0	0	0	0	0	0	0	1	0	1	0	0	0	0	0	0	0	0	0	0	0	1
T	D	G	1	R1	0	0	0	0	0	0	0	0	0	0	0	0	0	0	0	0	0	0	0	0	0	0	0	0	0	0	0	0	0	0	0	0	0	0	0	0	0	0	0	0	0	0
T	D	G	1	R2	0	0	0	0	0	0	0	0	0	0	0	0	0	0	0	0	0	0	0	0	0	0	0	0	0	0	0	0	0	0	0	0	0	0	0	0	0	0	0	0	0	0
T	D	G	1	R3	2	0	0	0	0	0	0	0	0	0	0	0	0	2	0	0	0	0	0	0	0	0	0	0	0	0	0	0	0	0	0	0	0	0	0	0	0	0	0	0	0	0
T	D	G	1	R4	1	0	0	0	0	0	0	0	0	0	0	0	0	0	0	0	0	0	0	0	0	0	0	0	0	0	0	0	0	0	0	0	0	0	0	0	0	0	0	0	0	1
T	D	G	2	R1	0	0	0	0	0	0	0	0	0	0	0	0	0	0	0	0	0	0	0	0	0	0	0	0	0	0	0	0	0	0	0	0	0	0	0	0	0	0	0	0	0	0
T	D	G	2	R2	2	0	0	0	0	0	0	0	0	0	0	0	0	0	0	0	0	0	0	0	0	0	0	0	0	0	0	0	0	1	0	0	0	0	1	0	0	0	0	0	0	0
T	D	G	2	R3	5	0	0	0	0	0	0	0	0	0	0	0	0	1	2	0	0	0	0	0	0	0	0	0	0	0	0	0	0	0	0	0	0	0	0	0	2	0	0	0	0	0
T	D	G	2	R4	0	0	0	0	0	0	0	0	0	0	0	0	0	0	0	0	0	0	0	0	0	0	0	0	0	0	0	0	0	0	0	0	0	0	0	0	0	0	0	0	0	0
T	D	G	3	R1	0	0	0	0	0	0	0	0	0	0	0	0	0	0	0	0	0	0	0	0	0	0	0	0	0	0	0	0	0	0	0	0	0	0	0	0	0	0	0	0	0	0
T	D	G	3	R2	0	0	0	0	0	0	0	0	0	0	0	0	0	0	0	0	0	0	0	0	0	0	0	0	0	0	0	0	0	0	0	0	0	0	0	0	0	0	0	0	0	0
T	D	G	3	R3	6	0	1	0	0	1	0	0	0	0	0	0	0	2	0	0	0	0	0	0	0	0	0	0	0	0	0	0	0	0	0	0	0	0	0	0	0	0	0	2	0	0
T	D	G	3	R4	3	0	0	0	0	0	0	0	0	0	0	0	0	0	0	0	0	0	0	0	0	0	0	0	1	0	0	0	0	0	0	0	0	0	1	0	0	0	0	0	0	1
					7405	64	30	1	7	19	15	28	5	762	13	40	11	320	637	126	1143	1	1	1	22	32	2	2	6	4	340	544	603	19	42	2	141	8	173	162	1582	135	8	28	1	325
						64	30	1	7	19	15	28	5	762	13	40	11	320	637	126	1143	1	1	1	22	32	2	2	6	4	340	544	603	19	42	2	141	8	173	162	1582	135	8	28	1	325

## Sheet: Std_data_transect
Site	Type	EI	Transect	Plot	Agomue	Amaaen	Amaaul	Amacom	Amaeur	Amalun	Amaple	Amasim	Ancdor	Anibin	Asafla	Badbip	Bemlam	Bempro	Bemqua	Bemtet	Calfus	Calmel	Ciccam	Clifos	Haraff	Harlat	Hartar	Leifer	Leiful	Lorpil	Nebbre	Nebsal	Notbig	Notqua	Notsub	Poecup	Poever	Pseruf	Ptemad	Ptemel	Ptenig	Ptestr	Ptever	Stopum	Trequa
B	A	C2	1	BAC1	0	0	0	0	0	0	0	0	28	0	0	1.33333	14.6667	57.3333	9.33333	82.6667	0	0	0	2.66667	0	0	0	0	1.33333	0	21.3333	17.3333	0	0	0	0	0	1.33333	0	13.3333	0	0	0	0	40
B	A	C30	2	BAC2	2.66667	0	0	0	0	0	0	0	40	0	1.33333	0	10.6667	45.3333	4	45.3333	0	0	0	1.33333	0	0	0	0	0	5.33333	10.6667	46.6667	0	2.66667	0	1.33333	0	2.66667	0	22.6667	0	0	1.33333	0	14.6667
B	A	H	3	BAH3	0	0	0	0	0	0	0	0	20	0	0	2.66667	5.33333	9.33333	0	136	0	0	0	1.33333	0	0	0	0	0	1.33333	33.3333	0	1.33333	0	0	0	0	0	0	0	0	0	0	0	14.6667
B	B	C2	4	BBC4	4	0	0	0	0	0	0	0	62	0	4	0	32	32	10	183	0	0	0	0	0	0	0	0	0	26	15	26	1	0	0	7	0	4	0	284	5	0	2	0	8
B	B	C30	5	BBC5	4	0	0	0	1	0	0	0	71	0	0	0	15	32	3	130	0	0	0	0	1	0	0	0	0	7	21	25	1	0	1	19	0	4	0	527	8	0	0	0	24
B	B	G	6	BBG6	0	1	0	0	1	2	1	0	50	0	0	1	2	13	2	19	0	0	0	0	4	1	2	0	0	2	3	0	0	1	0	1	0	1	0	44	4	0	3	0	5
B	C	C2	7	BCC7	12	0	0	0	0	0	0	0	38	0	0	0	0	9.33333	10	34.3333	0	0	0	0	2	0	0	0	0	10.6667	5.66667	7.66667	0	1	0	8	1	5.33333	0	9.66667	22.6667	0	0	0	19.6667
B	C	C30	8	BCC8	0	0	0	0	0	0	0	0	41	1	2	0	5	16	2	13	0	0	0	0	0	0	0	0	0	21	13	29	0	1	0	5	0	4	0	34	41	0	0	0	24
B	C	CN	9	BCA9	3	0	0	0	1	0	0	0	6	0	0	0	7	26	4	0	0	0	1	0	2	0	0	0	0	2	0	0	0	0	0	0	0	4	55	3	0	0	0	0	2
B	C	H	10	BCH10	0	1	0	0	0	0	0	0	3	0	0	2	0	1	0	3	0	0	0	0	0	0	0	0	0	3	2	0	1	1	0	1	1	5	46	11	1	0	0	1	0
B	D	C2	11	BDC11	2	0	0	0	0	0	0	0	12	0	0	0	0	6	2	3	0	0	0	0	0	0	0	0	0	14	62	53	0	1	0	0	0	8	1	28	2	0	0	0	8
B	D	C30	12	BDC12	3	0	0	0	0	0	0	0	15	0	0	0	6	1	1	6	0	0	0	0	0	0	0	0	0	16	64	97	0	0	0	0	0	8	1	92	0	0	0	0	9
B	D	CN	13	BDA13	0	0	0	0	0	0	0	0	5	0	1	0	7	21	1	11	0	0	0	0	0	0	0	1	0	2	35	34	0	2	0	1	0	3	1	8	3	0	0	0	2
B	D	G	14	BDG14	0	0	0	0	0	0	0	0	9	0	0	0	2	9	0	3	0	0	0	0	0	0	0	1	0	4	15	0	1	1	0	0	1	2	0	5	1	0	0	0	1
P	A	C2	15	PAC15	1	0	0	0	0	0	0	0	42	0	6	0	35	43	0	4	0	0	0	4	0	0	0	0	0	11	3	25	0	1	0	2	0	0	0	17	2	0	1	0	10
P	A	C30	16	PAC16	1	0	0	0	0	0	1	0	49	0	2	0	19	30	0	9	0	0	0	2	0	0	0	0	0	18	15	34	0	0	0	8	0	0	0	13	1	0	0	0	15
P	A	H	17	PAH17	0	3	0	0	1	1	0	0	1	0	0	1	2	0	0	0	1	0	0	0	0	0	0	0	0	1	1	2	1	0	0	0	0	0	0	4	0	0	0	0	6
P	B	C2	18	PBC18	0	0	0	0	1	0	0	0	18	0	4	0	1	11	2	20	0	0	0	0	1	0	0	0	0	23	28	6	0	5	0	0	0	2	0	15	4	1	1	0	23
P	B	C30	19	PBC19	0	0	0	0	0	0	0	0	17	0	1	0	4	7	1	14	0	0	0	0	1	0	0	0	0	17	23	18	0	10	0	1	0	1	0	26	1	0	0	0	31
P	B	G	20	PBG20	0	7	0	0	0	1	6	0	3	0	1	0	0	0	0	18	0	0	0	0	1	0	0	0	0	0	8	5	0	0	0	0	0	1	0	4	0	3	1	0	14
P	C	C2	21	PCC21	0	0	0	0	0	0	0	0	36	1.33333	1.33333	0	8	18.6667	2.66667	65.3333	0	0	0	4	2.66667	0	0	0	0	24	5.33333	1.33333	0	1.33333	0	16	0	42.6667	0	66.6667	18.6667	1.33333	1.33333	0	2.66667
P	C	C30	22	PCC22	0	0	0	0	0	0	0	0	9.33333	0	0	0	2.66667	18.6667	2.66667	29.3333	0	0	0	0	0	0	0	0	0	10.6667	17.3333	5.33333	0	1.33333	1.33333	14.6667	1.33333	18.6667	0	137.333	14.6667	0	0	0	0
P	C	CN	23	PCA23	3	0	0	0	1	0	0	0	6	2	3	0	3	16	31	34	0	0	0	1	0	0	0	2	0	4	3	7	0	0	0	29	1	8	1	34	1	0	0	0	2
P	C	H	24	PCH24	0	0	0	0	0	0	0	0	2	1	0	0	1	2	0	3	0	0	0	1	1	1	0	1	1	0	3	0	0	2	0	2	1	17	0	1	0	0	0	0	1
P	D	C2	25	PDC25	2.66667	0	0	0	0	0	0	0	40	0	0	0	18.6667	17.3333	8	68	0	0	0	0	0	0	0	0	0	29.3333	1.33333	17.3333	0	0	0	2.66667	0	1.33333	0	25.3333	0	0	0	0	9.33333
P	D	C30	26	PDC26	0	0	0	0	0	0	0	0	25.3333	0	0	0	10.6667	26.6667	18.6667	20	0	0	0	0	0	0	0	0	0	20	5.33333	16	0	0	0	2.66667	0	0	0	53.3333	2.66667	0	0	0	17.3333
P	D	CN	27	PDA27	1.33333	0	0	1.33333	0	0	0	0	0	0	0	0	20	14.6667	2.66667	38.6667	0	1.33333	0	1.33333	0	0	0	0	0	0	4	4	0	0	0	0	0	1.33333	0	10.6667	0	0	0	0	5.33333
P	D	G	28	PDG28	0	0	0	0	0	0	1.33333	0	2.66667	0	0	0	2.66667	5.33333	0	2.66667	0	0	0	0	0	0	0	0	0	2.66667	0	0	0	0	0	0	0	0	0	0	2.66667	1.33333	0	0	0
T	A	C2	29	TAC29	0	0	0	0	1.33333	1.33333	1.33333	0	0	0	0	0	6.66667	30.6667	8	25.3333	0	0	0	0	0	0	0	0	0	5.33333	1.33333	2.66667	1.33333	2.66667	0	0	0	5.33333	0	4	4	0	0	0	0
T	A	C30	30	TAC30	1.33333	0	0	0	0	2.66667	2.66667	0	21.3333	0	1.33333	0	6.66667	22.6667	1.33333	17.3333	0	0	0	1.33333	0	0	0	0	0	9.33333	1.33333	0	1.33333	4	0	2.66667	0	1.33333	0	10.6667	1.33333	0	0	0	1.33333
T	A	H	31	TAH31	0	0	0	0	0	0	0	0	0	0	0	0	0	0	0	0	0	0	0	0	0	0	0	0	1	0	4	6	0	0	0	0	0	0	0	1	0	0	0	0	0
T	B	C2	32	TBC2	5	0	0	0	0	0	1	0	24	1	5	0	12	31	1	104	0	0	0	0	0	0	0	0	0	9	17	13	3	1	0	2	0	1	0	37	1	0	4	0	0
T	B	C30	33	TBC33	2	0	0	0	0	0	0	0	34	0	4	0	12	25	2	40	0	0	0	1	0	0	0	0	0	17	11	28	2	3	0	3	0	1	0	47	1	0	2	0	6
T	B	G	34	TBG34	1	0	0	0	1	0	0	0	7	0	0	1	14	26	0	62	0	0	0	0	0	0	0	0	1	6	15	5	0	1	0	1	0	0	0	12	1	2	1	0	4
T	C	C2	35	TCC5	2	0	0	0	0	0	4	0	46	0	2	0	6	10	2	13	0	0	0	1	1	0	0	0	0	15	22	28	0	1	0	2	1	2	0	11	1	0	0	0	3
T	C	C30	36	TCC36	1	0	0	0	0	0	0	0	21	0	0	0	6	13	0	11	0	0	0	0	1	0	0	0	0	11	32	33	2	1	0	1	0	0	0	42	1	0	3	0	5
T	C	CN	37	TCA37	9	1	0	4	5	5	5	0	8	3	1	0	2	17	6	7	0	0	0	2	7	0	0	0	0	6	24	11	0	0	0	17	0	9	0	7	2	0	2	0	0
T	C	H	38	TCH38	0	0	0	0	0	0	0	0	0	0	0	1	0	4	0	1	0	0	0	0	0	0	0	0	0	4	10	19	0	0	0	0	0	2	0	0	0	0	0	0	11
T	D	C2	39	TDC9	0	0	0	0	1	0	0	0	2	0	1	2	6	1	0	0	0	0	0	0	0	0	0	0	0	1	5	2	0	0	0	0	0	12	44	0	0	0	0	0	5
T	D	C30	40	TDC40	4	1	1	0	0	0	1	0	1	0	0	0	23	14	0	1	0	0	0	1	1	0	0	0	0	4	7	3	1	0	0	0	0	5	3	2	0	0	0	0	1
T	D	CN	41	TDA41	3	15	0	2	4	3	5	5	6	4	0	0	13	19	4	4	0	0	0	0	7	0	0	0	0	6	2	4	2	0	0	1	1	6	10	4	0	0	4	0	6
T	D	G	42	TDG42	0	1	0	0	1	0	0	0	0	0	0	0	5	2	0	0	0	0	0	0	0	0	0	1	0	0	0	0	1	0	0	0	0	2	0	2	0	0	2	0	2

## Sheet: GLM
Site	Type	Distance	Transect	Lat	Long	Abundance	Richness	FD	CWM_size	GEN	SPE	OH	Fall	Spring	cl.1	cl.2	cl.3	cl.4
B	A	C2	1	144741	203605	290.667	13	0.23645	6.44954	0.990826	0.00458716	0.00458716	0.325688	0.674312	0.422018	0.394495	0.183486	0
B	B	C2	2	143783	206387	705	17	0.262781	10.0113	0.944681	0.0439716	0.0113475	0.485106	0.514894	0.123404	0.392908	0.476596	0.0070922
B	C	C2	3	144468	204001	197	16	0.266163	8.64298	0.84264	0.0592217	0.0981387	0.358714	0.641286	0.203046	0.48731	0.194585	0.115059
B	D	C2	4	145405	205446	202	14	0.191979	10.8663	0.871287	0.0742574	0.0544554	0.80198	0.19802	0.0841584	0.153465	0.747525	0.0148515
P	A	C2	5	145644	180163	207	16	0.258734	6.94686	0.908213	0.0869565	0.00483092	0.275362	0.724638	0.458937	0.304348	0.227053	0.00966184
P	B	C2	6	147307	180999	166	18	0.294805	8.1506	0.783133	0.192771	0.0240964	0.46988	0.53012	0.277108	0.379518	0.319277	0.0240964
P	C	C2	7	148812	188475	321.333	20	0.317555	10.0332	0.775934	0.0829876	0.141079	0.427386	0.572614	0.107884	0.410788	0.423237	0.0580913
P	D	C2	8	147476	175633	241.333	13	0.236781	7.30387	0.861878	0.121547	0.0165746	0.226519	0.773481	0.220994	0.58011	0.198895	0
T	A	C2	9	109888	147478	101.333	15	0.250449	6.65789	0.815789	0.0921053	0.0921053	0.171053	0.828947	0.486842	0.328947	0.144737	0.0394737
T	B	C2	10	111742	147478	272	19	0.230317	7.76471	0.908088	0.0661765	0.0257353	0.253676	0.746324	0.194853	0.540441	0.261029	0.00367647
T	C	C2	11	111637	148111	173	20	0.246099	8.53757	0.843931	0.104046	0.0520231	0.387283	0.612717	0.138728	0.473988	0.381503	0.00578035
T	D	C2	12	111335	148309	82	12	0.336774	12.7805	0.280488	0.0243902	0.695122	0.829268	0.170732	0.182927	0.0365854	0.243902	0.536585
B	A	C30	13	144749	203624	258.667	17	0.265905	7.63918	0.943299	0.0360825	0.0206186	0.376289	0.623711	0.304124	0.371134	0.324742	0
B	B	C30	14	143772	206427	894	18	0.230586	11.7752	0.978747	0.0100671	0.0111857	0.681208	0.318792	0.0850112	0.237136	0.668904	0.00894855
B	C	C30	15	144440	204001	252	16	0.28762	10.1468	0.888889	0.0952381	0.015873	0.575397	0.424603	0.198413	0.297619	0.34127	0.162698
B	D	C30	16	145423	205426	319	13	0.183844	11.5611	0.912226	0.0501567	0.0376176	0.84953	0.15047	0.0532915	0.125392	0.818182	0.0031348
P	A	C30	17	145621	180183	217	15	0.253016	7.69124	0.898618	0.0921659	0.00921659	0.359447	0.640553	0.304147	0.368664	0.322581	0.00460829
P	B	C30	18	147330	180979	173	16	0.294475	8.41618	0.82659	0.16185	0.0115607	0.578035	0.421965	0.312139	0.277457	0.404624	0.00578035
P	C	C30	19	148793	188495	285.333	15	0.262835	12.0935	0.88785	0.046729	0.0654206	0.67757	0.32243	0.0934579	0.17757	0.67757	0.0514019
P	D	C30	20	147472	175614	218.667	12	0.291223	8.45122	0.908537	0.0914634	0	0.432927	0.567073	0.335366	0.29878	0.353659	0.0121951
T	A	C30	21	111279	148368	112	19	0.23818	6.97619	0.785714	0.142857	0.0714286	0.142857	0.857143	0.345238	0.5	0.142857	0.0119048
T	B	C30	22	111825	148369	241	19	0.283549	8.55187	0.879668	0.107884	0.0124481	0.390041	0.609959	0.224066	0.39834	0.373444	0.00414938
T	C	C30	23	111643	148151	184	16	0.274767	10.0326	0.913043	0.076087	0.0108696	0.61413	0.38587	0.146739	0.255435	0.592391	0.00543478
T	D	C30	24	111356	148289	74	18	0.342451	7.2973	0.716216	0.0675676	0.216216	0.297297	0.702703	0.527027	0.175676	0.256757	0.0405405

## Sheet: Functional_traits_list
Species	size.cl	season	wing	diet
Agomue	2	spring	macro	omni
Amaaen	2	spring	macro	herbi
Amaaul	3	fall	macro	herbi
Amacom	2	spring	macro	herbi
Amaeur	3	spring	macro	herbi
Amalun	2	spring	macro	herbi
Amaple	2	spring	macro	herbi
Amasim	2	spring	macro	herbi
Ancdor	2	spring	macro	generalist
Anibin	3	spring	macro	generalist
Asafla	1	spring	macro	specialist
Badbip	1	spring	macro	generalist
Bemlam	1	spring	dipoly	generalist
Bempro	1	spring	dipoly	generalist
Bemqua	1	spring	macro	generalist
Bemtet	2	spring	dipoly	generalist
Calfus	3	fall	dipoly	generalist
Calmel	2	fall	dipoly	generalist
Ciccam	3	spring	macro	generalist
Clifos	2	spring	dipoly	generalist
Haraff	3	spring	macro	herbi
Harlat	2	fall	macro	herbi
Hartar	2	spring	macro	herbi
Leifer	2	fall	macro	specialist
Leiful	2	fall	macro	specialist
Lorpil	2	spring	macro	specialist
Nebbre	3	fall	macro	generalist
Nebsal	3	fall	macro	generalist
Notbig	1	spring	dipoly	specialist
Notqua	1	spring	dipoly	specialist
Notsub	1	spring	macro	specialist
Poecup	3	spring	macro	generalist
Poever	2	spring	macro	generalist
Pseruf	3	fall	macro	omni
Ptemad	4	fall	brachy	omni
Ptemel	3	fall	dipoly	generalist
Ptenig	4	fall	macro	generalist
Ptestr	2	spring	dipoly	generalist
Ptever	2	spring	dipoly	generalist
Stopum	2	spring	brachy	generalist
Trequa	1	fall	macro	generalist

## Sheet: ANOSIM
Code	Agomue	Amaaen	Amaaul	Amaeur	Amalun	Amaple	Ancdor	Anibin	Asafla	Badbip	Bemlam	Bempro	Bemqua	Bemtet	Clifos	Haraff	Leiful	Lorpil	Nebbre	Nebsal	Notbig	Notqua	Notsub	Poecup	Poever	Pseruf	Ptemad	Ptemel	Ptenig	Ptestr	Ptever	Trequa
BAC21	0	0	0	0	0	0	28	0	0	1.33333	14.6667	57.3333	9.33333	82.6667	2.66667	0	1.33333	0	21.3333	17.3333	0	0	0	0	0	1.33333	0	13.3333	0	0	0	40
BBC22	4	0	0	0	0	0	62	0	4	0	32	32	10	183	0	0	0	26	15	26	1	0	0	7	0	4	0	284	5	0	2	8
BCC23	12	0	0	0	0	0	38	0	0	0	0	9.33333	10	34.3333	0	2	0	10.6667	5.66667	7.66667	0	1	0	8	1	5.33333	0	9.66667	22.6667	0	0	19.6667
BDC24	2	0	0	0	0	0	12	0	0	0	0	6	2	3	0	0	0	14	62	53	0	1	0	0	0	8	1	28	2	0	0	8
BAC313	2.66667	0	0	0	0	0	40	0	1.33333	0	10.6667	45.3333	4	45.3333	1.33333	0	0	5.33333	10.6667	46.6667	0	2.66667	0	1.33333	0	2.66667	0	22.6667	0	0	1.33333	14.6667
BBC314	4	0	0	1	0	0	71	0	0	0	15	32	3	130	0	1	0	7	21	25	1	0	1	19	0	4	0	527	8	0	0	24
BCC315	0	0	0	0	0	0	41	1	2	0	5	16	2	13	0	0	0	21	13	29	0	1	0	5	0	4	0	34	41	0	0	24
BDC316	3	0	0	0	0	0	15	0	0	0	6	1	1	6	0	0	0	16	64	97	0	0	0	0	0	8	1	92	0	0	0	9
PAC25	1	0	0	0	0	0	42	0	6	0	35	43	0	4	4	0	0	11	3	25	0	1	0	2	0	0	0	17	2	0	1	10
PBC26	0	0	0	1	0	0	18	0	4	0	1	11	2	20	0	1	0	23	28	6	0	5	0	0	0	2	0	15	4	1	1	23
PCC27	0	0	0	0	0	0	36	1.33333	1.33333	0	8	18.6667	2.66667	65.3333	4	2.66667	0	24	5.33333	1.33333	0	1.33333	0	16	0	42.6667	0	66.6667	18.6667	1.33333	1.33333	2.66667
PDC28	2.66667	0	0	0	0	0	40	0	0	0	18.6667	17.3333	8	68	0	0	0	29.3333	1.33333	17.3333	0	0	0	2.66667	0	1.33333	0	25.3333	0	0	0	9.33333
PAC317	1	0	0	0	0	1	49	0	2	0	19	30	0	9	2	0	0	18	15	34	0	0	0	8	0	0	0	13	1	0	0	15
PBC318	0	0	0	0	0	0	17	0	1	0	4	7	1	14	0	1	0	17	23	18	0	10	0	1	0	1	0	26	1	0	0	31
PCC319	0	0	0	0	0	0	9.33333	0	0	0	2.66667	18.6667	2.66667	29.3333	0	0	0	10.6667	17.3333	5.33333	0	1.33333	1.33333	14.6667	1.33333	18.6667	0	137.333	14.6667	0	0	0
PDC320	0	0	0	0	0	0	25.3333	0	0	0	10.6667	26.6667	18.6667	20	0	0	0	20	5.33333	16	0	0	0	2.66667	0	0	0	53.3333	2.66667	0	0	17.3333
TAC29	0	0	0	1.33333	1.33333	1.33333	0	0	0	0	6.66667	30.6667	8	25.3333	0	0	0	5.33333	1.33333	2.66667	1.33333	2.66667	0	0	0	5.33333	0	4	4	0	0	0
TBC210	5	0	0	0	0	1	24	1	5	0	12	31	1	104	0	0	0	9	17	13	3	1	0	2	0	1	0	37	1	0	4	0
TCC211	2	0	0	0	0	4	46	0	2	0	6	10	2	13	1	1	0	15	22	28	0	1	0	2	1	2	0	11	1	0	0	3
TDC212	0	0	0	1	0	0	2	0	1	2	6	1	0	0	0	0	0	1	5	2	0	0	0	0	0	12	44	0	0	0	0	5
TAC321	1.33333	0	0	0	2.66667	2.66667	21.3333	0	1.33333	0	6.66667	22.6667	1.33333	17.3333	1.33333	0	0	9.33333	1.33333	0	1.33333	4	0	2.66667	0	1.33333	0	10.6667	1.33333	0	0	1.33333
TBC322	2	0	0	0	0	0	34	0	4	0	12	25	2	40	1	0	0	17	11	28	2	3	0	3	0	1	0	47	1	0	2	6
TCC323	1	0	0	0	0	0	21	0	0	0	6	13	0	11	0	1	0	11	32	33	2	1	0	1	0	0	0	42	1	0	3	5
TDC324	4	1	1	0	0	1	1	0	0	0	23	14	0	1	1	1	0	4	7	3	1	0	0	0	0	5	3	2	0	0	0	1
Info-Anosim
Code	Site
BAC21	B
BBC22	B
BCC23	B
BDC24	B
BAC313	B
BBC314	B
BCC315	B
BDC316	B
PAC25	P
PBC26	P
PCC27	P
PDC28	P
PAC317	P
PBC318	P
PCC319	P
PDC320	P
TAC29	T
TBC210	T
TCC211	T
TDC212	T
TAC321	T
TBC322	T
TCC323	T
TDC324	T
